# Supplementary material for: Exploring intermolecular interactions and energetics in crystalline substituted thieno[2,3-d]pyrimidines
Source: Royal Society of Chemistry journal article supplement (doi:10.1039/d5ce00071h), 2025-01-01
Supplement: d5ce00071h1.pdf [file d5ce00071h1.pdf]

## Supporting Information

### Exploring Intermolecular Interactions and Energetics in Crystalline Substituted Thieno[2,3-*d*]pyrimidines

Pran Kishore Deb<sup>\*a#</sup>, Anila M Menon<sup>b#</sup>, Fathima Nida P S R<sup>b</sup>, Ipsha Shruti<sup>b</sup>, Sara Nidal<sup>c</sup>, Katharigatta N. Venugopala<sup>d,e</sup>, Deepak Chopra<sup>b\*</sup>

<sup>a</sup> Department of Pharmaceutical Sciences and Technology, Birla Institute of Technology, Mesra, Ranchi Jharkhand, India-835215

<sup>b</sup> Crystallography and Crystal Chemistry Laboratory, Department of Chemistry, Indian Institute of Science Education and Research Bhopal, Bhopal Bypass Road, Bhauri, Bhopal, Madhya Pradesh, India-462066

<sup>c</sup> Department of Chemistry, Loughborough University, Loughborough, Leicestershire-LE113TU, United Kingdom

<sup>d</sup> Department of Biotechnology and Food Science, Faculty of Applied Sciences, Durban University of Technology, Durban, 4000, South Africa

<sup>e</sup> Department of Pharmaceutical Sciences, College of Clinical Pharmacy, King Faisal University, Al-Ahsa 31982, Saudi Arabia.

<sup>#</sup>: Both the authors have contributed equally.

#### Corresponding Authors\*

1. **Dr. Pran Kishore Deb**, Assistant Professor, Department of Pharmaceutical Sciences and Technology, Birla Institute of Technology (BIT), Mesra, Ranchi 835215, Jharkhand, India; [prankishore1@gmail.com](mailto:prankishore1@gmail.com); [prankishoredeb@bitmesra.ac.in](mailto:prankishoredeb@bitmesra.ac.in) (P.K.D.) ORCID: <http://orcid.org/0000-0002-8650-2874>
2. **Prof. Deepak Chopra**, Professor and Head, Crystallography and Crystal Chemistry Laboratory, Department of Chemistry, Indian Institute of Science Education and Research Bhopal, Bhopal Bypass Road, Bhauri, Bhopal, Madhya Pradesh, India-462066, India; [dchopra@iiserb.ac.in](mailto:dchopra@iiserb.ac.in) (D.C.), ORCID: <http://orcid.org/0000-0002-0018-6007>

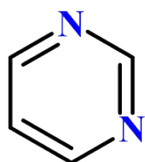

Pyrimidine

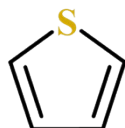

Thiophene

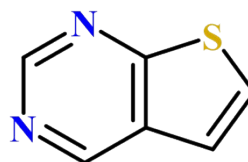

Thieno[2,3-*d*]pyrimidine

**Figure S1:** Chemical structures of pyrimidine, thiophene and thieno[2,3-*d*]pyrimidine.

#### Characterization via Nuclear Magnetic Resonance (NMR) Spectroscopy

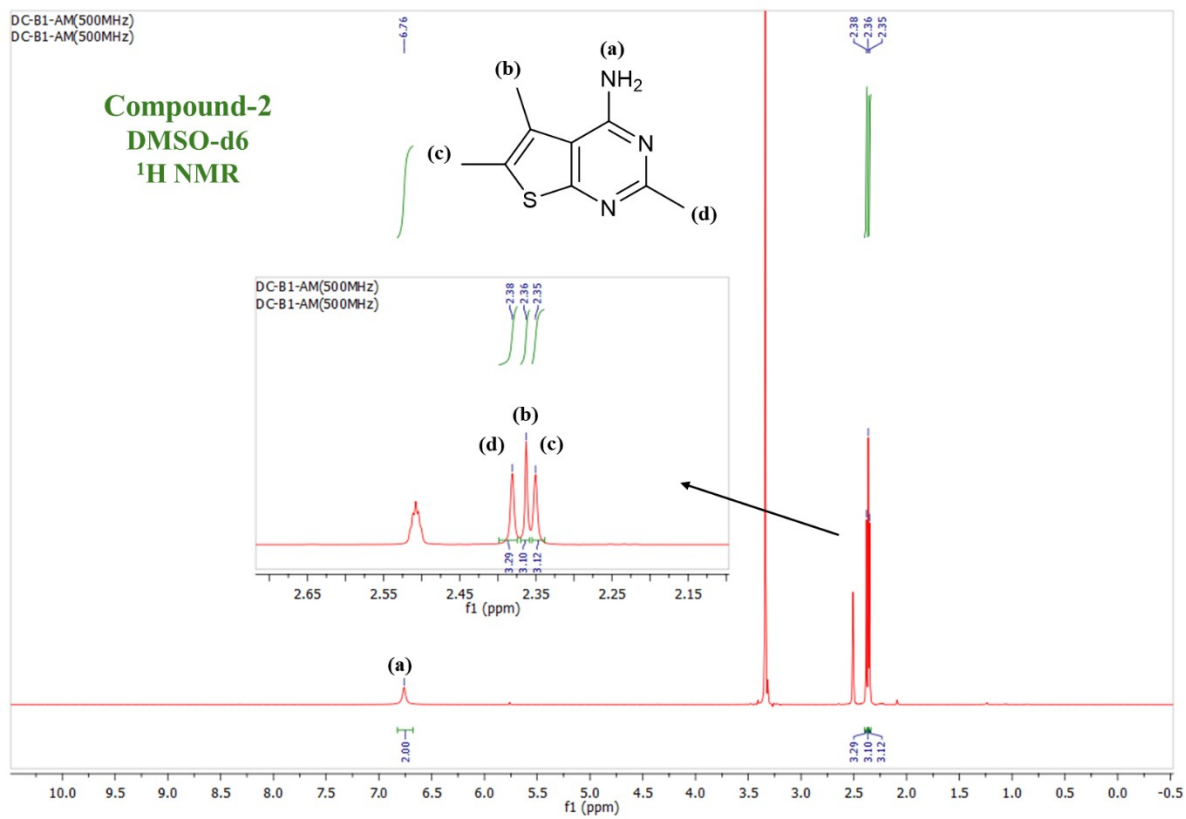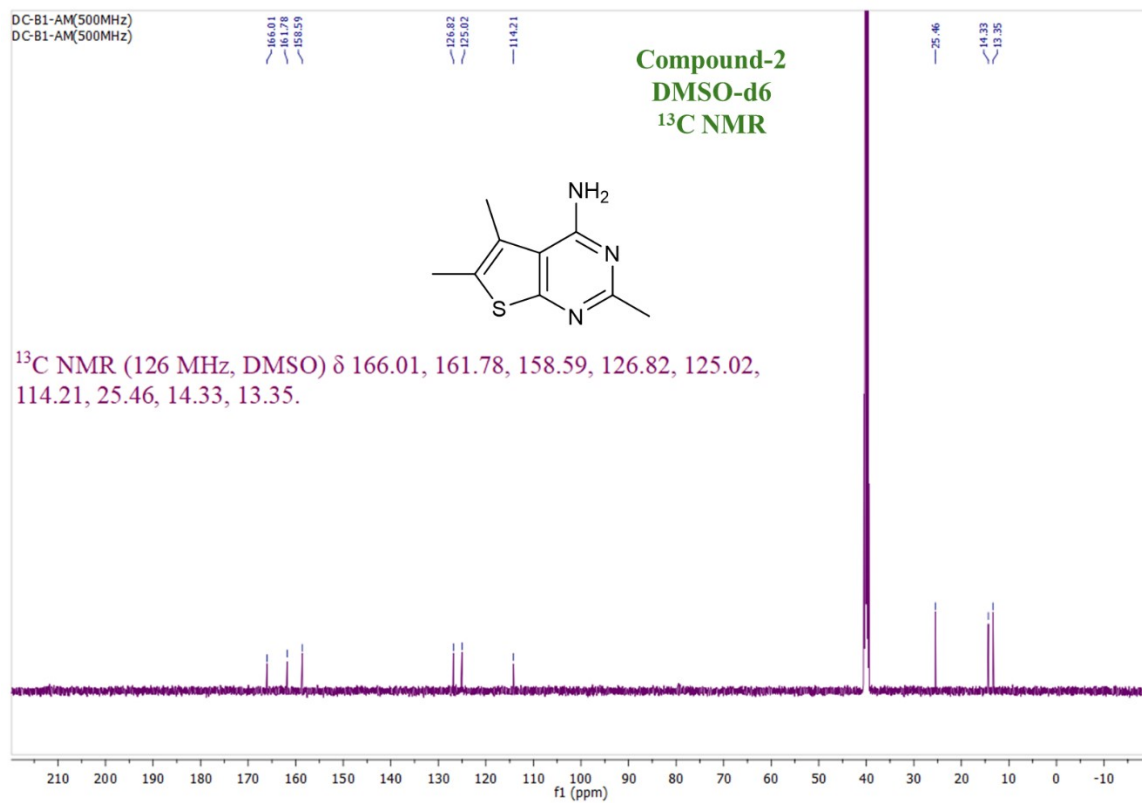

**Figure S2.** <sup>1</sup>H and <sup>13</sup>C NMR characterization of compound 2.

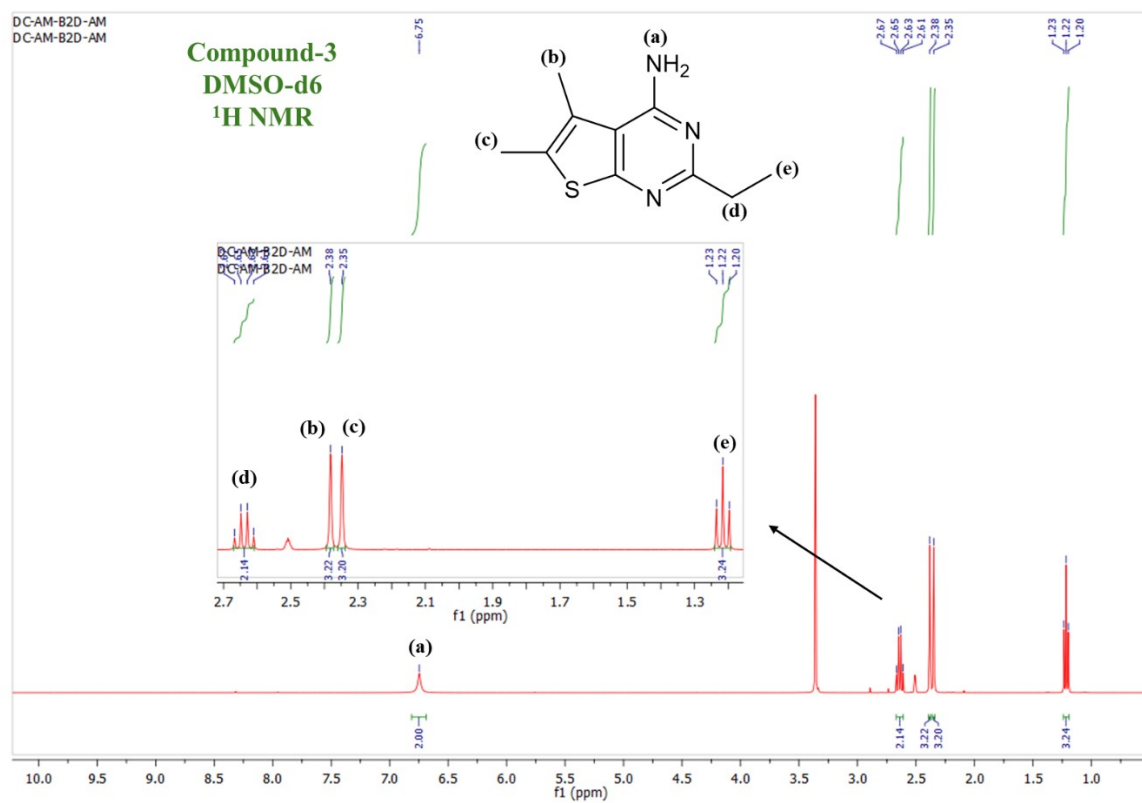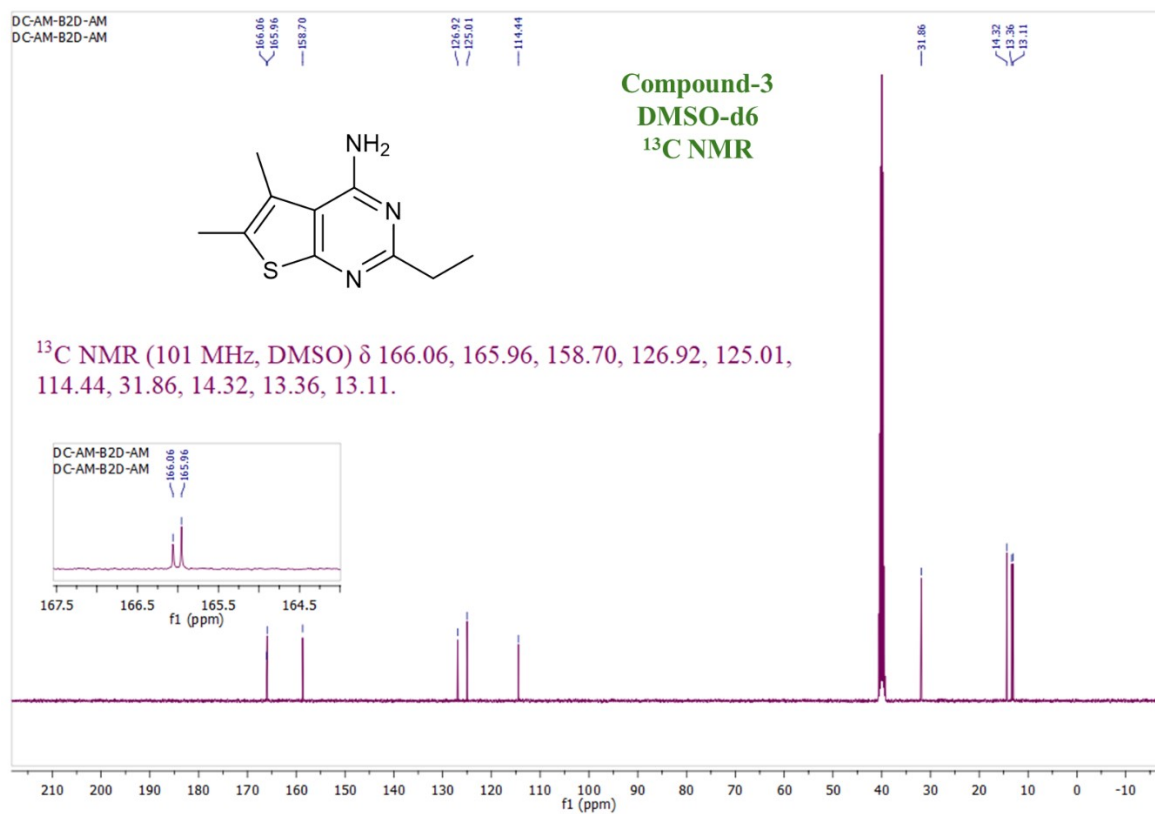

**Figure S3.** <sup>1</sup>H and <sup>13</sup>C NMR characterization of compound 3.

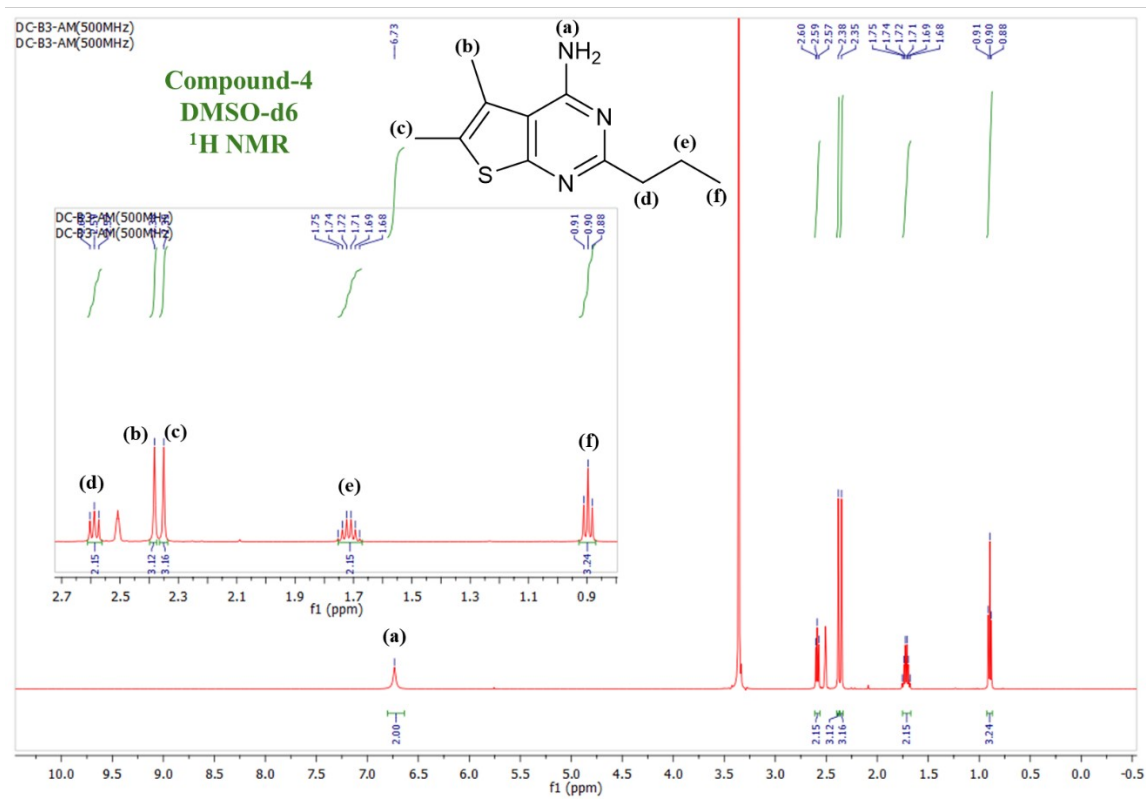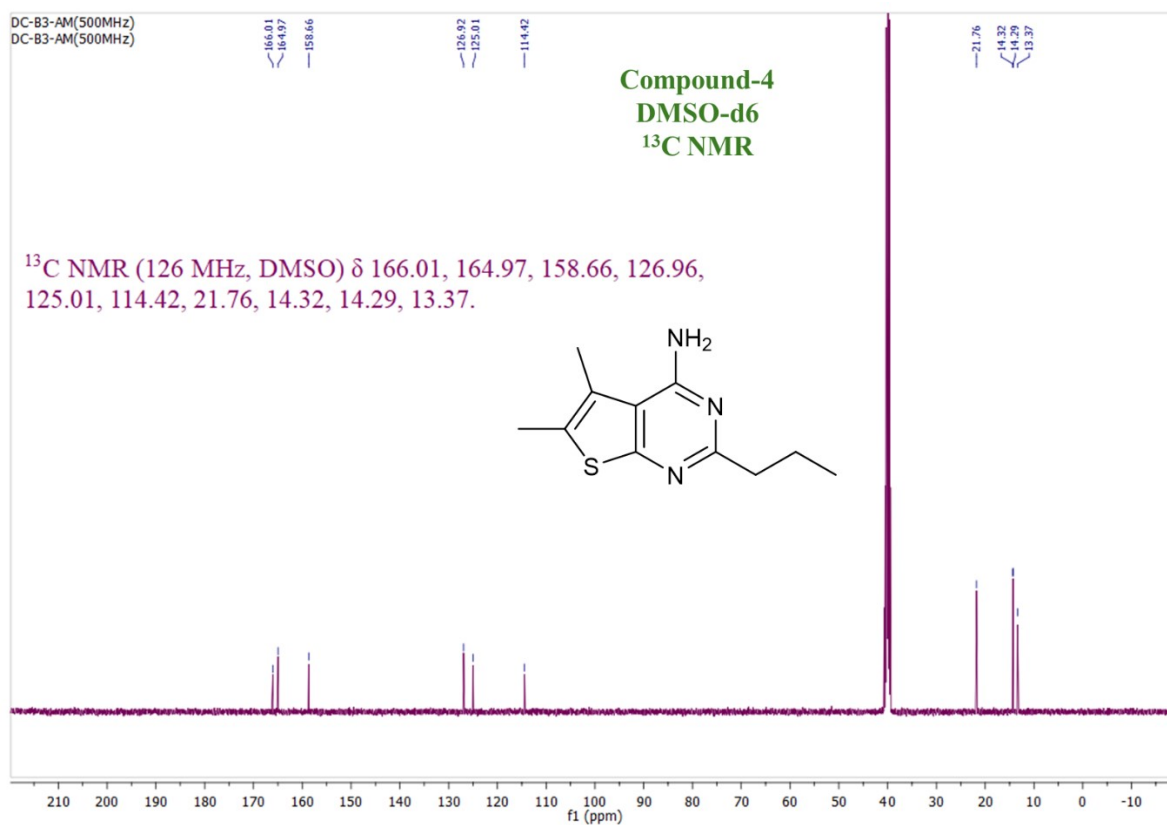

**Figure S4.** <sup>1</sup>H and <sup>13</sup>C NMR characterization of compound 4.

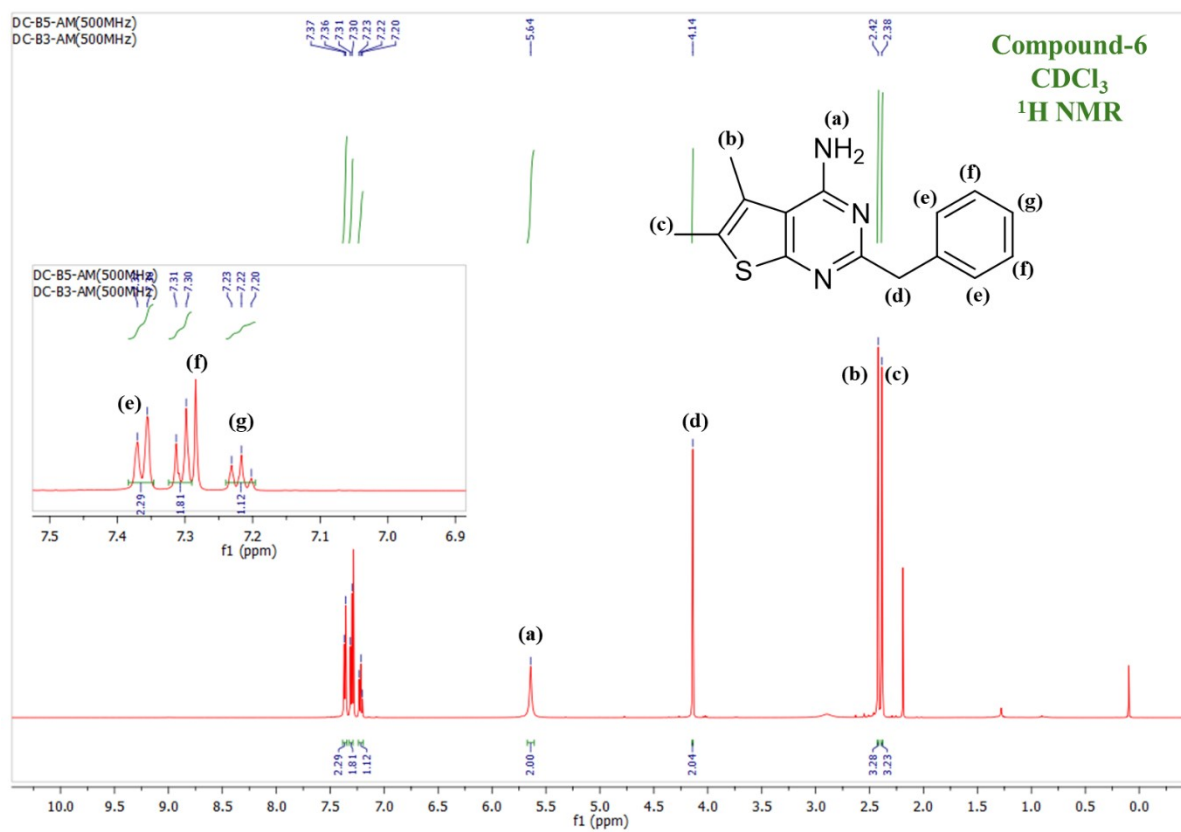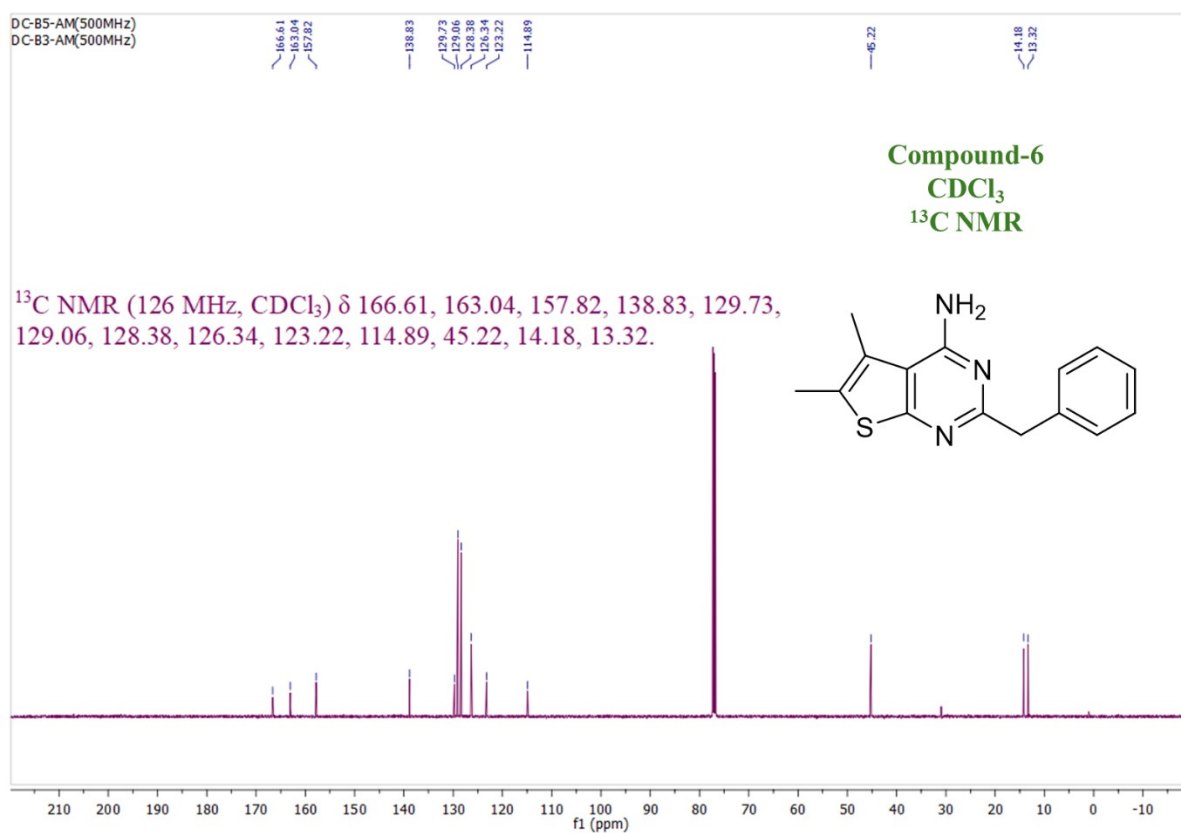

**Figure S5.** <sup>1</sup>H and <sup>13</sup>C NMR characterization of compound 6.

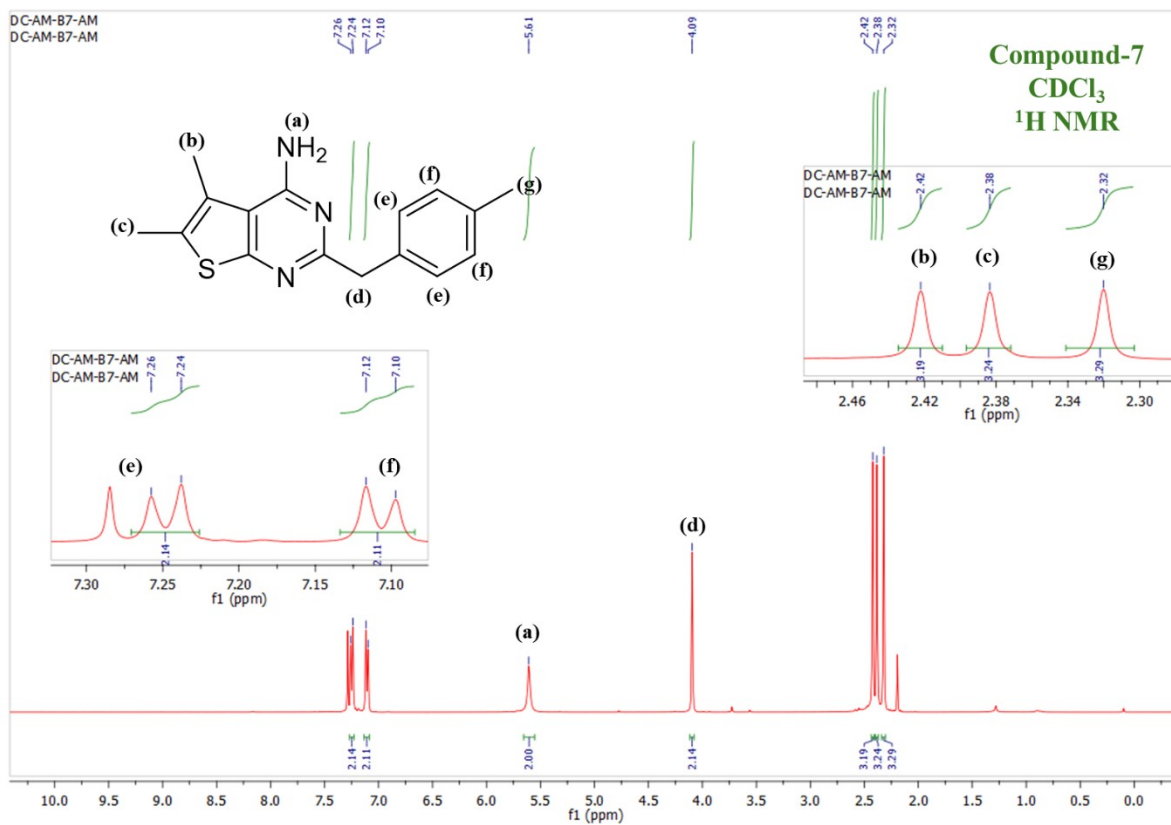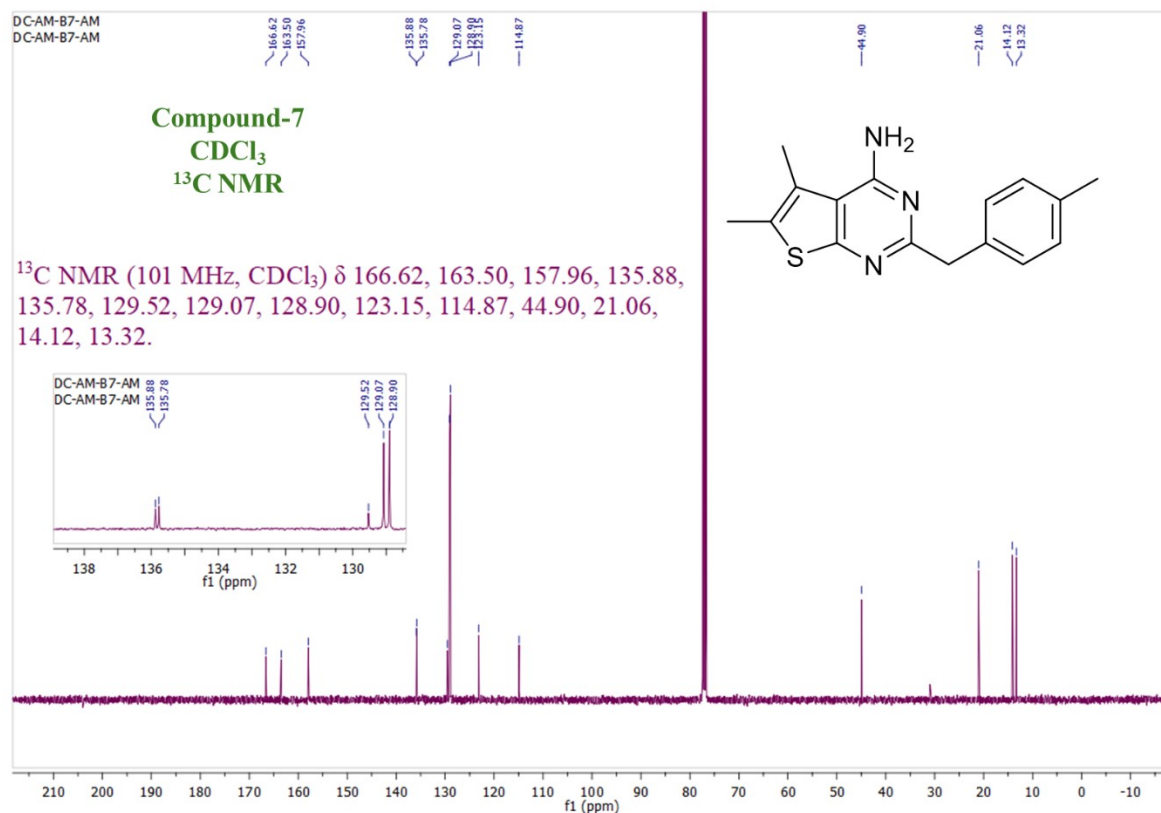

**Figure S6.** <sup>1</sup>H and <sup>13</sup>C NMR characterization of compound 7.

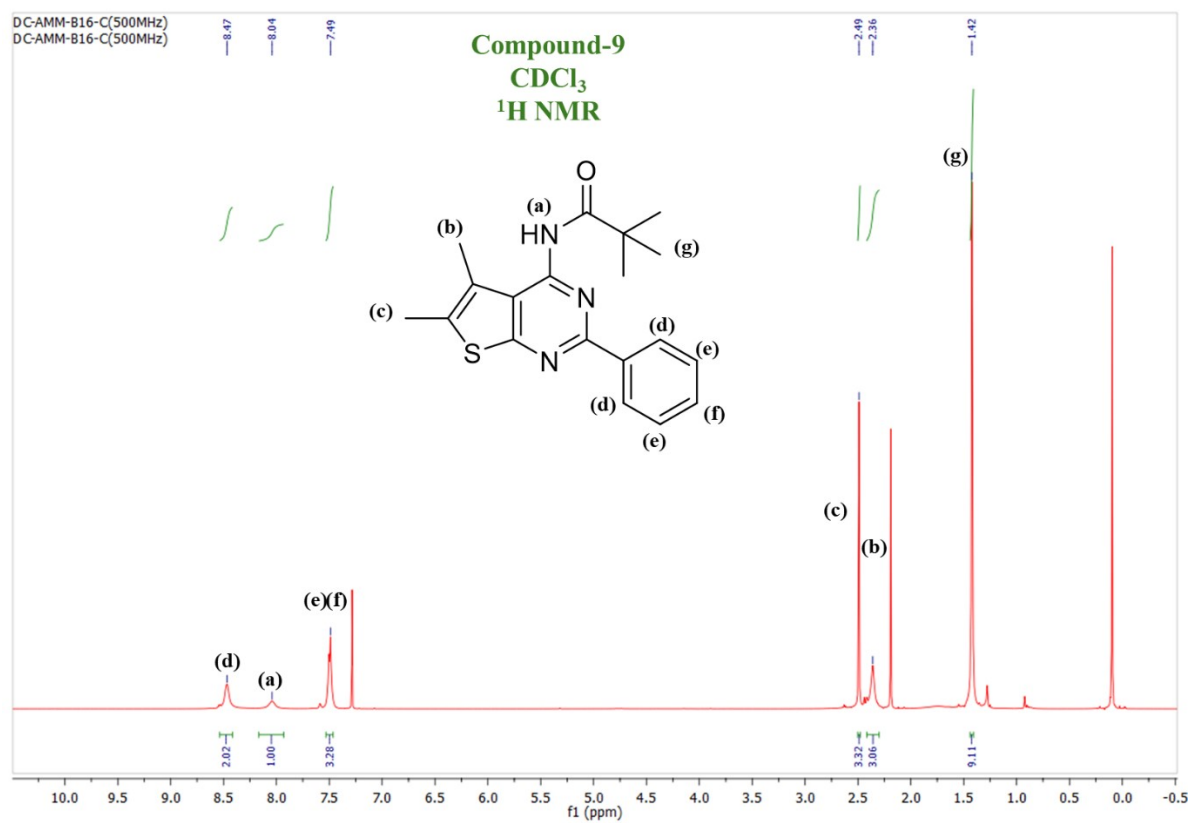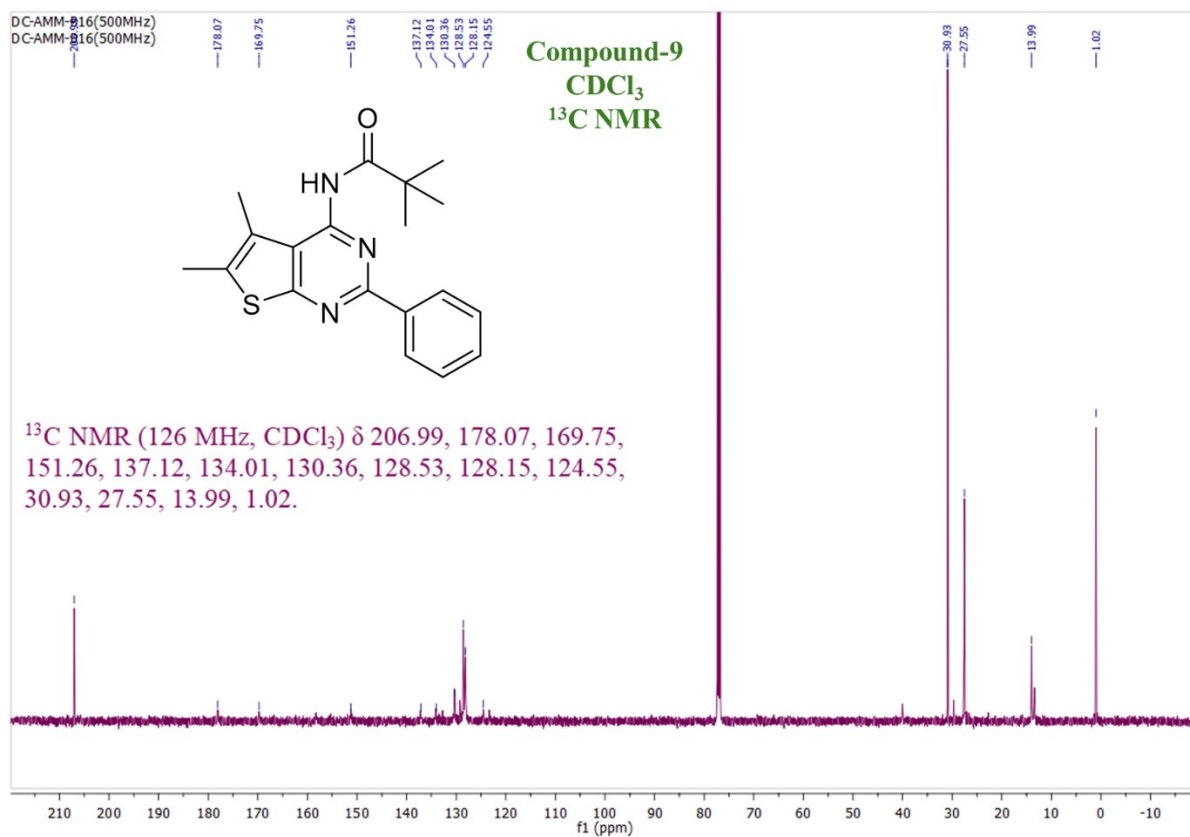

**Figure S7.** <sup>1</sup>H and <sup>13</sup>C NMR characterization of compound 9.

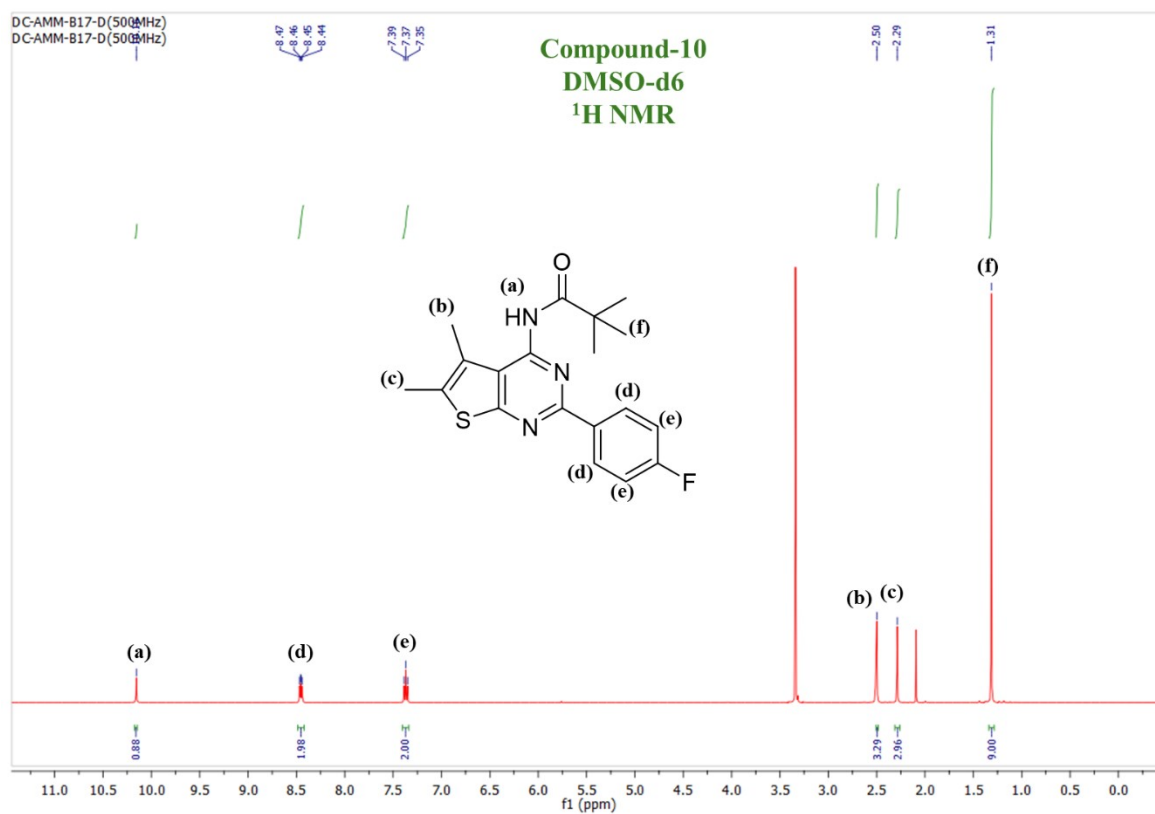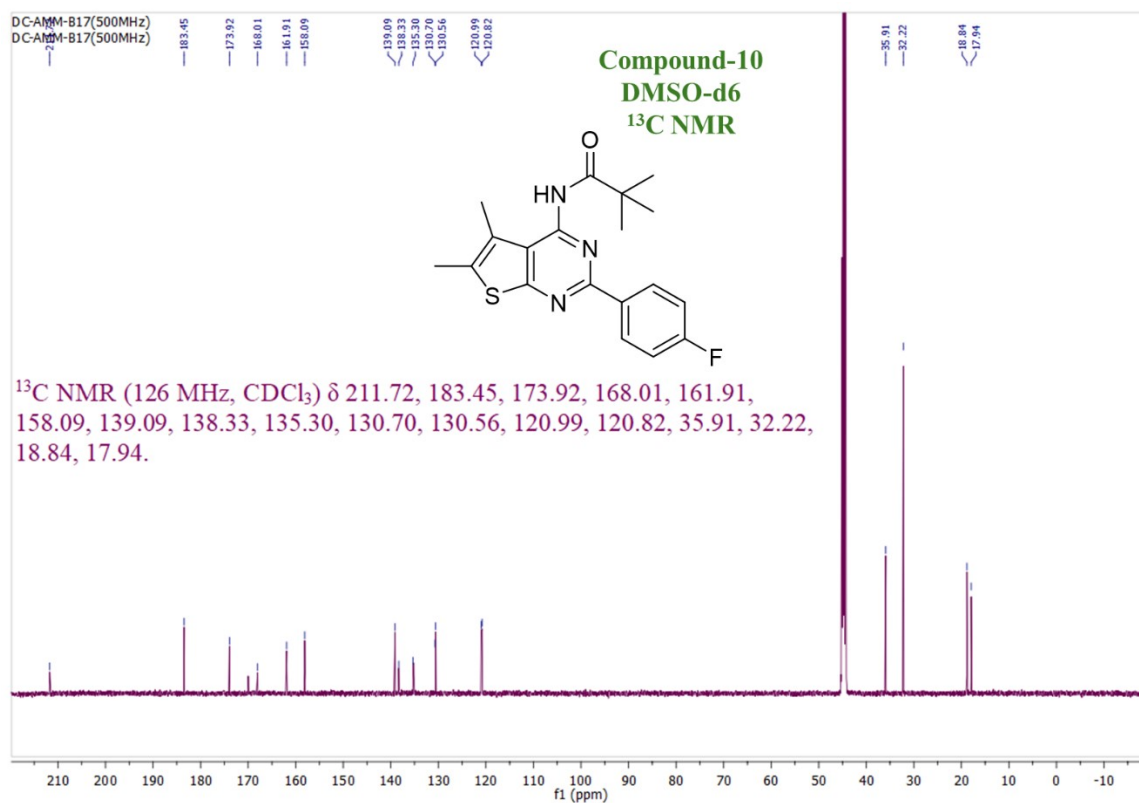

**Figure S8.** <sup>1</sup>H and <sup>13</sup>C NMR characterization of compound 10.



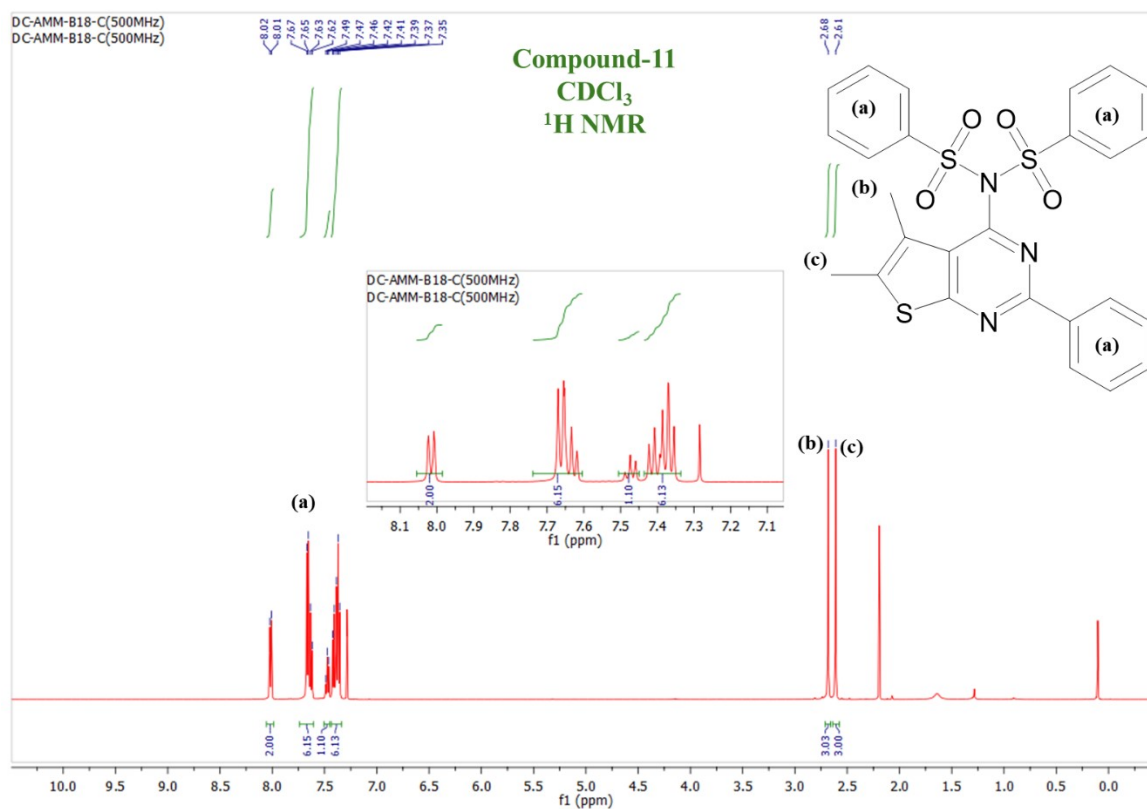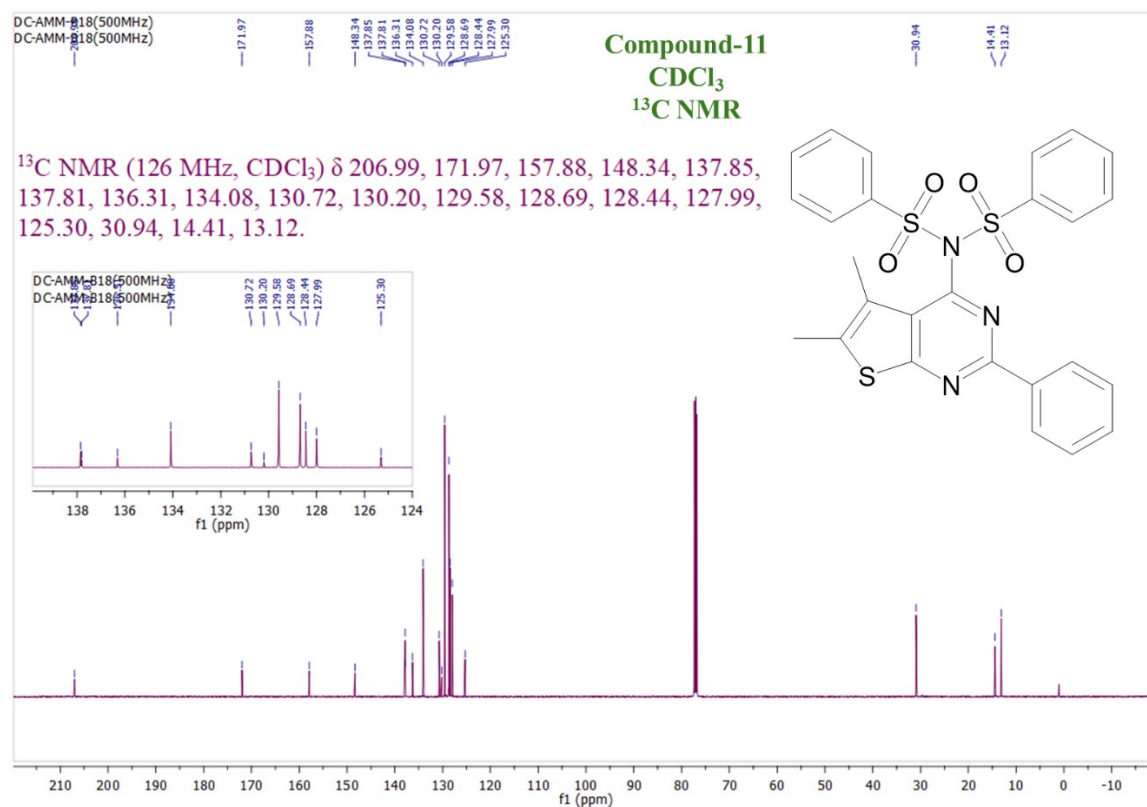

**Figure S9.** <sup>1</sup>H and <sup>13</sup>C NMR characterization of compound 11.

## Liquid Chromatography Mass Spectrometry (LCMS)

**Compound 2:** Calculated  $[M+H]^+ = 194.1$  ; Observed  $[M+H]^+ = 194.1$

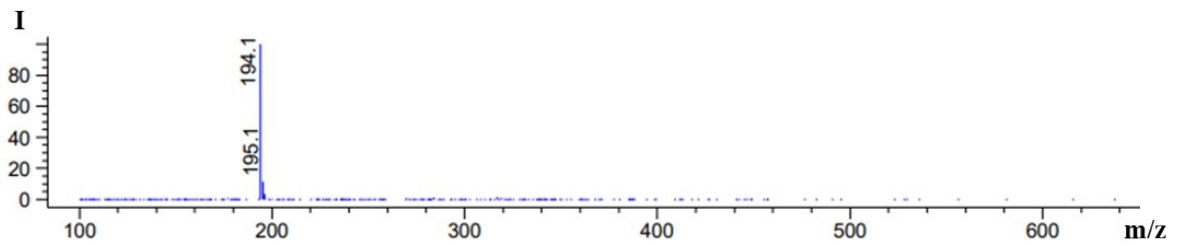

**Compound 3:** Calculated  $[M+H]^+ = 208.1$  ; Observed  $[M+H]^+ = 208.2$

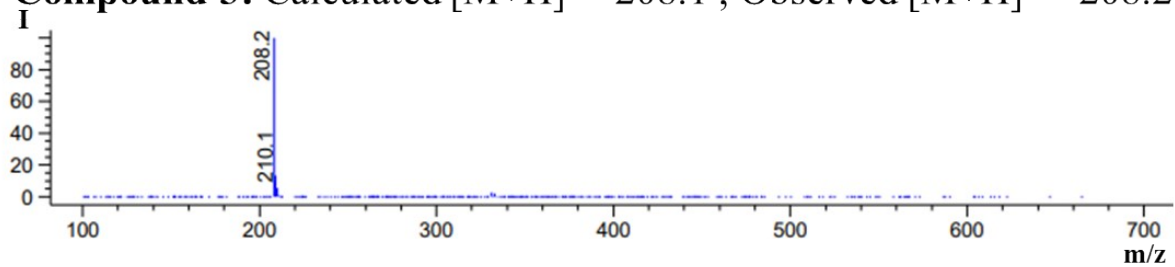

**Compound 4:** Calculated  $[M+H]^+ = 222.1$  ; Observed  $[M+H]^+ = 222.1$

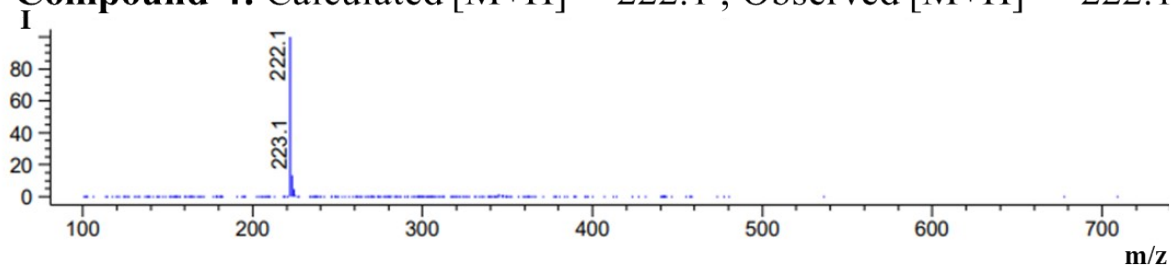

**Compound 6:** Calculated  $[M+H]^+ = 270.1$  ; Observed  $[M+H]^+ = 270.1$

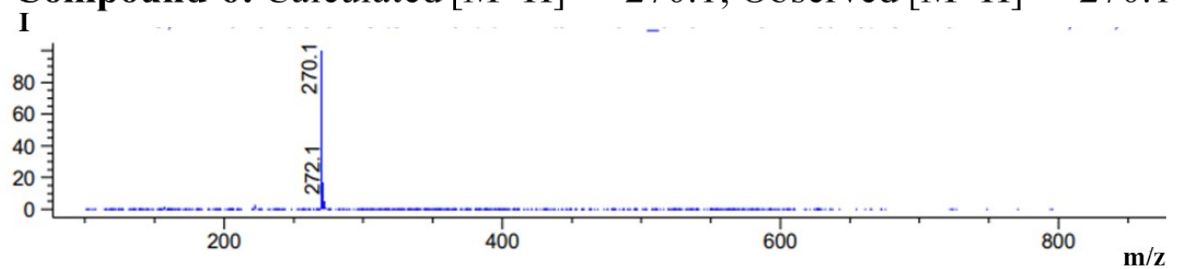

**Compound 7:** Calculated  $[M+H]^+ = 284.1$  ; Observed  $[M+H]^+ = 284.1$

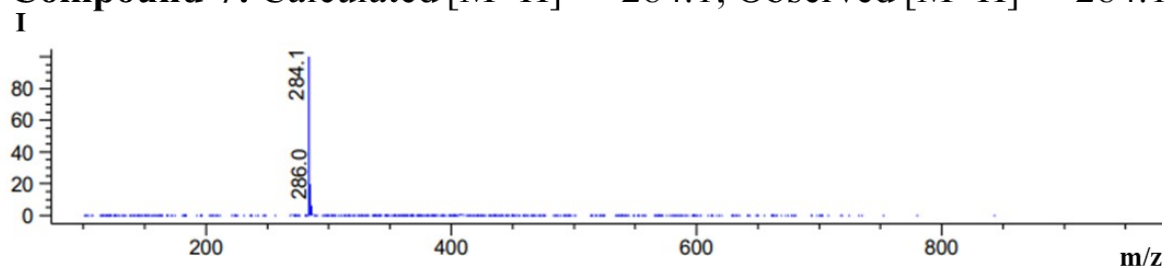

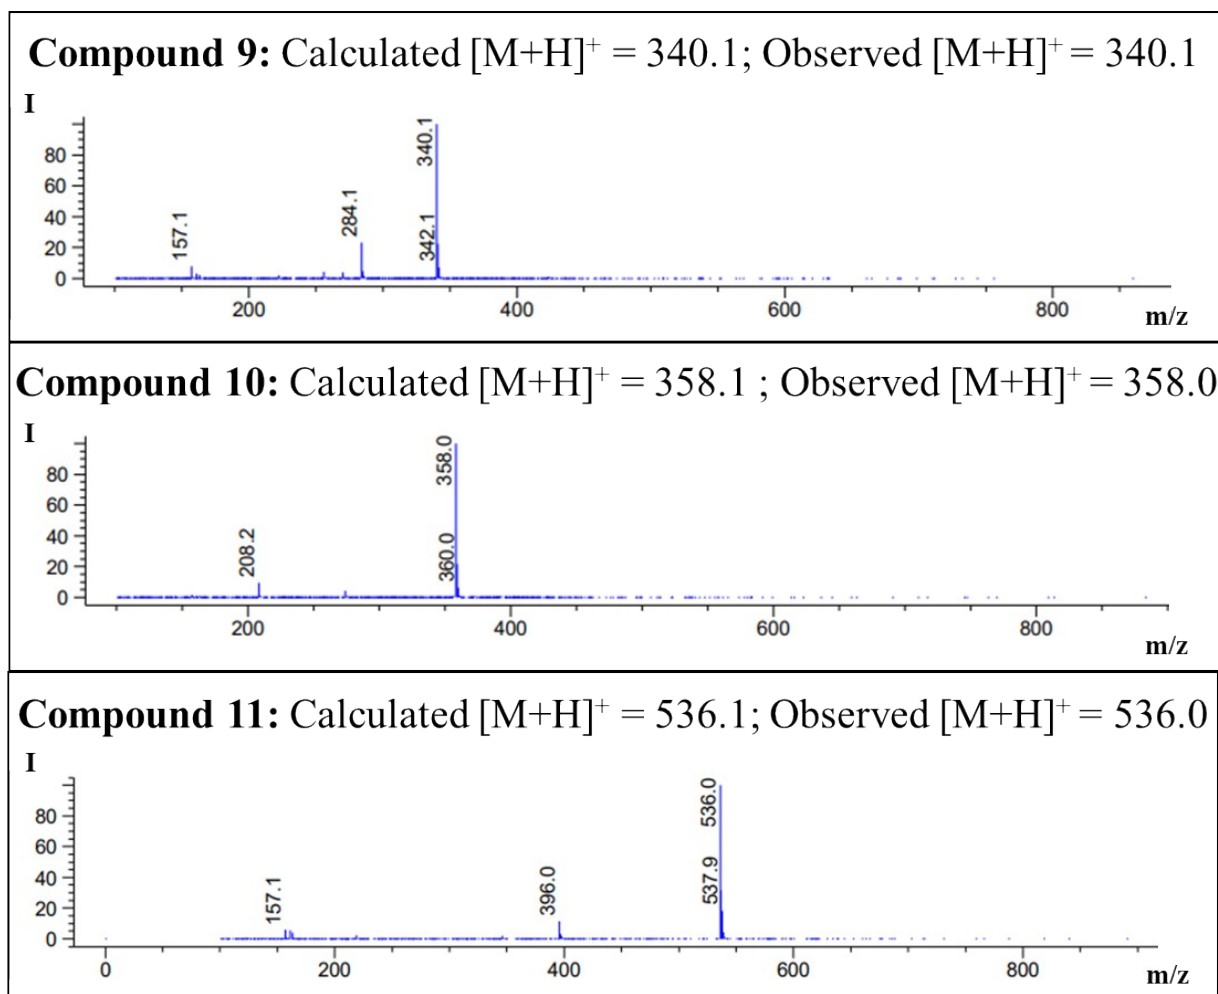

**Figure S10.** Low resolution LCMS spectra for all eight compounds exhibiting good correlation among the calculated and observed mass.

**Table S1:** Molecular formula, molecular weight, percentage yield, melting point,  $R_f$  values for all eight compounds (2-4, 6, 7, 9-11).

| CODE | COMPOUND | M.F                | MWT    | Yield (%) | MP ( $^{\circ}$ C) | $R_f$ value (H : E)* |
|------|----------|--------------------|--------|-----------|--------------------|----------------------|
| 2    |          | $C_9H_{11}N_3S$    | 193.27 | 150       | 268-270            | 0.04 (7:3)           |
| 3    |          | $C_{10}H_{13}N_3S$ | 207.30 | 135       | 212-213            | 0.15 (7:3)           |
| 4    |          | $C_{11}H_{15}N_3S$ | 221.32 | 165       | 172-173            | 0.24 (7:3)           |

|           |                                                                                    |                                                                               |        |      |         |            |
|-----------|------------------------------------------------------------------------------------|-------------------------------------------------------------------------------|--------|------|---------|------------|
| <b>6</b>  | 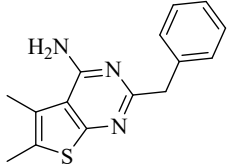  | C <sub>15</sub> H <sub>15</sub> N <sub>3</sub> S                              | 269.37 | 175  | 226-228 | 0.66 (6:4) |
| <b>7</b>  |   | C <sub>16</sub> H <sub>17</sub> N <sub>3</sub> S                              | 283.39 | 75   | 208-210 | 0.30 (7:3) |
| <b>9</b>  |   | C <sub>19</sub> H <sub>21</sub> N <sub>3</sub> OS                             | 339.46 | 45   | 228-229 | 0.86 (6:4) |
| <b>10</b> |   | C <sub>19</sub> H <sub>20</sub> FN <sub>3</sub> OS                            | 357.45 | 37.5 | 225-226 | 0.89 (6:4) |
| <b>11</b> |  | C <sub>20</sub> H <sub>16</sub> FN <sub>3</sub> O <sub>2</sub> S <sub>2</sub> | 413.49 | 27.5 | 231-233 | 0.83 (6:4) |

\*Rf value (H : E) = Hexane : Ethyl acetate

### Single Crystal X-ray Diffraction (SCXRD)

**Table S2:** Crystallization screens of eight compounds (2-4, 6, 7, 9-11).

| Sample Code | Solvent used    | Crystallization conditions* | Morphology |
|-------------|-----------------|-----------------------------|------------|
| <b>2</b>    | Dichloromethane | Δ-Soluble/ LT               | Needle     |
|             | Methanol        | Δ-Soluble/ LT               | Aggregate  |
|             | Ethanol         | Δ-Soluble/ LT               | Aggregate  |
|             | DMSO*           | Soluble/ RT                 | Needle     |
|             | Toluene         | Soluble/ LT                 | Needle     |
| <b>3</b>    | Dichloromethane | Soluble/ LT                 | Plate      |
|             | Methanol        | Soluble/ LT                 | Plate      |
|             | Toluene         | Soluble/ LT                 | Aggregate  |
|             | DMSO*           | Soluble/ RT                 | Plate      |
|             | Nitromethane    | Soluble/ LT                 | Plate      |
| <b>4</b>    | Dichloromethane | Δ-Soluble/ LT               | Plate      |
|             | Isopropanol     | Δ-Soluble/ LT               | Aggregate  |
|             | Toluene         | Soluble/ LT                 | Plate      |
|             | DMSO*           | Soluble/ RT                 | Plate      |
|             | Nitromethane    | Soluble/ LT                 | Plate      |
| <b>6</b>    | Dichloromethane | Δ-Soluble/ LT               | Plate      |
|             | Methanol        | Δ-Soluble/ LT               | Plate      |
|             | Nitromethane    | Soluble/ LT                 | Plate      |
|             | DMSO*           | Soluble/ RT                 | Plate      |
|             | Toluene         | Soluble/ LT                 | Plate      |

|    |                 |                       |           |
|----|-----------------|-----------------------|-----------|
| 7  | Dichloromethane | $\Delta$ -Soluble/ LT | Block     |
|    | Methanol        | $\Delta$ -Soluble/ LT | Block     |
|    | Toluene         | Soluble/ LT           | Block     |
|    | DMSO*           | Soluble/ RT           | Block     |
|    | Isopropanol     | $\Delta$ -Soluble/ LT | Block     |
| 9  | Dichloromethane | $\Delta$ -Soluble/ LT | Needle    |
|    | Isopropanol     | $\Delta$ -Soluble/ LT | Aggregate |
|    | Toluene         | Soluble/ LT           | Aggregate |
|    | DMSO*           | Soluble/ RT           | Needle    |
|    | Nitromethane    | Soluble/ LT           | Needle    |
| 10 | Dichloromethane | $\Delta$ -Soluble/ LT | Needle    |
|    | Isopropanol     | $\Delta$ -Soluble/ LT | Needle    |
|    | Methanol        | $\Delta$ -Soluble/ LT | Needle    |
|    | DMSO*           | Soluble/ RT           | Needle    |
|    | Nitromethane    | Soluble/ LT           | Needle    |
| 11 | Dichloromethane | Soluble/ LT           | Plate     |
|    | Methanol        | Soluble/ LT           | Aggregate |
|    | Toluene         | Soluble/ LT           | Aggregate |
|    | DMSO*           | Soluble/ RT           | Plate     |
|    | Nitromethane    | Soluble/ LT           | Plate     |

\*LT = 4 °C; RT = 22-25 °C. \*SCXRD data on crystals were collected from these solvent systems.

**Table S3.** Crystallographic and refinement data.

| Data                                    | 2                                               | 3                                                | 4                                                | 6                                                |
|-----------------------------------------|-------------------------------------------------|--------------------------------------------------|--------------------------------------------------|--------------------------------------------------|
| <b>Crystal System</b>                   | Monoclinic                                      | Monoclinic                                       | Triclinic                                        | Triclinic                                        |
| <b>Formula</b>                          | C <sub>9</sub> H <sub>11</sub> N <sub>3</sub> S | C <sub>10</sub> H <sub>13</sub> N <sub>3</sub> S | C <sub>11</sub> H <sub>15</sub> N <sub>3</sub> S | C <sub>15</sub> H <sub>15</sub> N <sub>3</sub> S |
| <b>Formula weight</b>                   | 193.27                                          | 207.29                                           | 221.32                                           | 269.36                                           |
| <b>CCDC no.</b>                         | <b>2402896</b>                                  | <b>2402893</b>                                   | <b>2402905</b>                                   | <b>2402899</b>                                   |
| <b>Space Group</b>                      | <i>P</i> <sub>2</sub> <sub>1</sub> / <i>c</i>   | <i>P</i> <sub>2</sub> <sub>1</sub> / <i>n</i>    | <i>P</i> -1                                      | <i>P</i> -1                                      |
| <b>Temperature(K)</b>                   | 100                                             | 100                                              | 100                                              | 100                                              |
| <b><i>a</i> (Å)</b>                     | 8.2226 (5)                                      | 13.9025(10)                                      | 16.9046 (13)                                     | 7.7792(8)                                        |
| <b><i>b</i>(Å)</b>                      | 7.7209 (5)                                      | 13.7290(10)                                      | 17.1968 (14)                                     | 8.2162(9)                                        |
| <b><i>c</i>(Å)</b>                      | 14..3343 (11)                                   | 15.9725(10)                                      | 17.8048 (15)                                     | 10.8622(9)                                       |
| <b><i>α</i> (°)</b>                     | 90                                              | 90                                               | 61.562 (3)                                       | 86.331(4)                                        |
| <b><i>β</i> (°)</b>                     | 94.293 (3)                                      | 98.472 (3)                                       | 79.591 (3)                                       | 69.979(4)                                        |
| <b><i>γ</i> (°)</b>                     | 90                                              | 90                                               | 88.984 (3)                                       | 88.546(4)                                        |
| <b>Volume [V(Å<sup>3</sup>)]</b>        | 907.47 (11)                                     | 3015.4(4)                                        | 4462.5 (6)                                       | 650.97(11)                                       |
| <b>Density (g/cm<sup>3</sup>)</b>       | 1.415                                           | 1.370                                            | 1.318                                            | 1.374                                            |
| <b>Z, Z'</b>                            | 1, 4                                            | 3, 12                                            | 8, 16                                            | 1, 2                                             |
| <b>Size of crystal (mm<sup>3</sup>)</b> | 0.589 × 0.098 ×<br>0.048                        | 0.457 × 0.298 ×<br>0.078                         | 0.296 × 0.201 ×<br>0.155                         | 0.220 × 0.118 ×<br>0.09                          |
| <b>μ/mm<sup>-1</sup></b>                | 0.309                                           | 0.284                                            | 0.261                                            | 0.237                                            |
| <b><i>F</i> (000)</b>                   | 408                                             | 1320                                             | 1888                                             | 284                                              |
| <b><i>θ</i><sub>min,max</sub></b>       | 2.48, 30.09                                     | 2.96, 29.94                                      | 2.33, 24.47                                      | 2.48, 27.82                                      |
| <b><i>h</i><sub>min,max</sub></b>       | -11, 11                                         | -19, 19                                          | -22, 22                                          | -10, 10                                          |

|                                                        |                                                |                                                  |                                                    |                                                            |
|--------------------------------------------------------|------------------------------------------------|--------------------------------------------------|----------------------------------------------------|------------------------------------------------------------|
| $k_{\min,\max}$                                        | -10, 10                                        | -19, 19                                          | -22, 22                                            | -11, 11                                                    |
| $l_{\min,\max}$                                        | -20, 20                                        | -22, 22                                          | -23, 23                                            | -15, 15                                                    |
| <b>No. of reflections</b>                              | 32694                                          | 148353                                           | 151665                                             | 50887                                                      |
| <b>No. of unique/ observed reflections</b>             | 2650, 2161                                     | 8841, 6621                                       | 22151, 10792                                       | 3839, 2489                                                 |
| <b>No. of parameters</b>                               | 129                                            | 412                                              | 1170                                               | 182                                                        |
| $R_{\text{all}}, R_{\text{obs}}$                       | 0.0467, 0.0371                                 | 0.0563, 0.0428                                   | 0.1762, 0.0888                                     | 0.0954, 0.0595                                             |
| $wR2_{\text{all}}, wR2_{\text{obs}}$                   | 0.1028, 0.0997                                 | 0.1310, 0.1257                                   | 0.2799, 0.2217                                     | 0.1508, 0.1406                                             |
| $\Delta\rho_{\max,\min}(\text{e}\cdot\text{\AA}^{-3})$ | 0.40, -0.24                                    | 0.42, -0.45                                      | 0.59, -0.50                                        | 0.35, -0.40                                                |
| <b>G.o.F</b>                                           | 1.089                                          | 1.103                                            | 0.913                                              | 1.071                                                      |
| <hr/>                                                  |                                                |                                                  |                                                    |                                                            |
| <b>Data</b>                                            | <b>7</b>                                       | <b>9</b>                                         | <b>10</b>                                          | <b>11</b>                                                  |
| <b>Crystal System</b>                                  | Monoclinic                                     | Monoclinic                                       | Orthorhombic                                       | Monoclinic                                                 |
| <b>Formula</b>                                         | $\text{C}_{16}\text{H}_{17}\text{N}_3\text{S}$ | $\text{C}_{19}\text{H}_{21}\text{N}_3\text{S O}$ | $\text{C}_{19}\text{H}_{20}\text{N}_3\text{S O F}$ | $\text{C}_{26}\text{H}_{21}\text{N}_3\text{O}_4\text{S}_3$ |
| <b>Formula weight</b>                                  | 283.38                                         | 339.45                                           | 357.44                                             | 535.64                                                     |
| <b>CCDC no.</b>                                        | <b>2402902</b>                                 | <b>2402903</b>                                   | <b>2402904</b>                                     | <b>2402900</b>                                             |
| <b>Space Group</b>                                     | $P2_1/c$                                       | $P2_1/c$                                         | $Pca2_1$                                           | $P2_1/c$                                                   |
| <b>Temperature(K)</b>                                  | 100                                            | 100                                              | 100                                                | 100                                                        |
| $a$ (Å)                                                | 11.2278(5)                                     | 14.0960(12)                                      | 8.5844(7)                                          | 16.9149(12)                                                |
| $b$ (Å)                                                | 9.7330(4)                                      | 13.0340(11)                                      | 19.2443(15)                                        | 9.8296(6)                                                  |
| $c$ (Å)                                                | 13.8833(5)                                     | 9.5091(6)                                        | 21.3684(18)                                        | 16.9361(12)                                                |
| $\alpha$ (°)                                           | 90                                             | 90                                               | 90                                                 | 90                                                         |
| $\beta$ (°)                                            | 110.469(2)                                     | 94.556(3)                                        | 90                                                 | 118.803(3)                                                 |
| $\gamma$ (°)                                           | 90                                             | 90                                               | 90                                                 | 90                                                         |
| <b>Volume [V(Å<sup>3</sup>)]</b>                       | 1421.38(10)                                    | 1741.6(2)                                        | 3530.1(5)                                          | 2467.5(3)                                                  |
| <b>Density (g/cm<sup>3</sup>)</b>                      | 1.324                                          | 1.295                                            | 1.345                                              | 1.442                                                      |
| <b>Z, Z'</b>                                           | 1, 4                                           | 1, 4                                             | 2, 8                                               | 1, 4                                                       |
| <b>Size of crystal (mm<sup>3</sup>)</b>                | $0.362 \times 0.161 \times$<br>0.114           | $0.331 \times 0.11 \times$<br>0.076              | $0.242 \times 0.089 \times$<br>0.069               | $0.355 \times 0.214 \times$<br>0.109                       |
| $\mu/\text{mm}^{-1}$                                   | 0.221                                          | 0.196                                            | 0.205                                              | 0.340                                                      |
| <b>F (000)</b>                                         | 600                                            | 720                                              | 1504                                               | 1112                                                       |
| $\theta_{\min,\max}$                                   | 2.61, 29.93                                    | 2.66, 28.11                                      | 2.77, 26.14                                        | 2.41, 29.90                                                |
| $h_{\min,\max}$                                        | -15, 15                                        | -19, 19                                          | -12, 12                                            | -22, 22                                                    |
| $k_{\min,\max}$                                        | -13, 13                                        | -18, 18                                          | -27, 26                                            | -13, 13                                                    |
| $l_{\min,\max}$                                        | -19, 19                                        | -13, 12                                          | -30, 30                                            | -22, 22                                                    |
| <b>No. of reflections</b>                              | 57862                                          | 77370                                            | 1247003                                            | 45875                                                      |
| <b>No. of unique/ observed reflections</b>             | 4169, 3142                                     | 5121, 3313                                       | 10326, 6548                                        | 6379, 4347                                                 |
| <b>No. of parameters</b>                               | 191                                            | 222                                              | 469                                                | 327                                                        |

|                                                             |                |                |                |                |
|-------------------------------------------------------------|----------------|----------------|----------------|----------------|
| $R_{\text{all}}, R_{\text{obs}}$                            | 0.0641, 0.0483 | 0.0943, 0.0564 | 0.1255, 0.0725 | 0.0780, 0.0506 |
| $wR2_{\text{all}}, wR2_{\text{obs}}$                        | 0.1420, 0.1367 | 0.1556, 0.1418 | 0.1596, 0.1432 | 0.1269, 0.1194 |
| $\Delta\rho_{\text{max,min}}(\text{e}\cdot\text{\AA}^{-3})$ | 0.61, -0.49    | 0.45, -0.44    | 0.34, -0.37    | 0.39, -0.40    |
| <b>G.o.F</b>                                                | 1.146          | 1.068          | 1.037          | 1.055          |

**Table S4:** List of intermolecular interactions. (Neutron normalised values<sup>1-2</sup> referred here are obtained from the *PARST* output file)

| Sample code | D-H...A           | D-H/Å | D...A/Å  | H...A/Å | D-H...A/° | Symmetry                  |
|-------------|-------------------|-------|----------|---------|-----------|---------------------------|
| 2           | N3-H3B...N1       | 1.030 | 3.579(2) | 2.69    | 144       | x, -y+1/2+1, z-1/2        |
|             | C8-H8A...N1       | 1.080 | 3.515(2) | 2.60    | 142       | x, -y+1/2+1, z-1/2        |
|             | C7-H7A...N3       | 1.080 | 3.779(2) | 2.75    | 159       | x, -y+1/2+1, z+1/2        |
|             | N3-H3A...N2       | 1.030 | 3.026(2) | 2.00    | 178       | -x+2, -y+1, -z+1          |
|             | C9-H9A...N2       | 1.080 | 3.609(2) | 2.73    | 138       | x-1, y, z                 |
|             | C8-H8A...S1       | 1.080 | 3.600(2) | 2.87    | 125       | -x+1, -y+2, -z+1          |
|             | C8-H8C...π(C6)    | 0.980 | 3.660(2) | 2.74    | 156       | -x+1, -y+1, -z+1          |
|             | C8-H8C...π(C3)    | 0.980 | 3.571(2) | 2.83    | 133       | -x+1, -y+1, -z+1          |
|             | S1...π(C8)        | -     | 3.600(2) | -       | -         | -x+1, -y+2, -z+1          |
| 3           | N6-H6A...N8       | 1.030 | 2.930(2) | 1.90    | 175       | x, y, z                   |
|             | N9-H9A...N5       | 1.030 | 3.098(2) | 2.07    | 176       | x, y, z                   |
|             | N9-H9B...N1       | 1.030 | 3.149(2) | 2.23    | 147       | x, y, z                   |
|             | C7-H27B...N6      | 1.080 | 3.477(2) | 2.66    | 132       | x, y, z                   |
|             | C29-H29A...N1     | 1.080 | 3.462(2) | 2.60    | 136       | x, y, z                   |
|             | N3-H3B...N7       | 1.030 | 3.354(2) | 2.47    | 144       | x+1, y, z                 |
|             | C9-H9E...N7       | 1.080 | 3.492(2) | 2.62    | 137       | x+1, y, z                 |
|             | C28-H28C...N3     | 1.080 | 3.609(2) | 2.55    | 167       | x-1, y, z                 |
|             | N3-H3A...N2       | 1.030 | 3.080(2) | 2.05    | 177       | -x+2, -y, -z+1            |
|             | C28-H28B...N4     | 1.080 | 3.436(2) | 2.67    | 128       | -x+1, -y+1, -z+1          |
|             | C19-H19A...π(C6)  | 0.980 | 3.631(1) | 2.74    | 151       | x-1/2, -y+1/2, z-1/2      |
|             | C9-H9C...π(C16)   | 0.980 | 3.669(1) | 2.76    | 155       | x+1/2, -y+1/2, z+1/2      |
|             | C20-H20A...π(C24) | 0.980 | 3.643(2) | 2.78    | 148       | -x+1, -y+1, -z+1          |
|             | C30-H30B...π(C5)  | 0.980 | 3.611(2) | 2.80    | 140       | -x+1/2+1, y-1/2, -z+1/2+1 |
|             | C10-H10A...π(C25) | 0.980 | 3.669(2) | 2.79    | 150       | -x+1/2+1, y-1/2, -z+1/2+1 |
|             | S2...S3           | -     | 3.586(4) | -       | 134, 134  | x+1/2, -y+1/2, +z-1/2     |

|   |                 |       |          |      |     |                |
|---|-----------------|-------|----------|------|-----|----------------|
| 4 | N12-H12A ...N14 | 1.030 | 3.005(1) | 1.98 | 177 | x,y,z          |
|   | N15-H15A ...N11 | 1.030 | 3.054(2) | 2.03 | 172 | x,y,z          |
|   | N15-H15B ...N19 | 1.030 | 3.400(2) | 2.53 | 142 | x,y,z          |
|   | N9-H9E ...N4    | 1.030 | 3.381(2) | 2.56 | 137 | x,y,z          |
|   | C18-H18D ...N9  | 1.080 | 3.639(2) | 2.63 | 156 | x,y,z          |
|   | C73-H73B ...N15 | 1.080 | 3.612(2) | 2.59 | 158 | x,y,z          |
|   | C54-H54C ...N19 | 1.080 | 3.656(2) | 2.68 | 139 | x,y,z          |
|   | C7-H7A ...N13   | 1.080 | 3.616(2) | 2.63 | 152 | x,y,z          |
|   | C84-H84A...N7   | 1.080 | 3.499(4) | 2.72 | 129 | x,y,z          |
|   | C84A-H84D...N7  | 1.080 | 3.499(4) | 2.64 | 136 | x,y,z          |
|   | C75-H75C ...N11 | 1.080 | 3.662(2) | 2.74 | 144 | x,y,z          |
|   | C85-H85B...S3   | 1.080 | 3.786(3) | 2.75 | 161 | x,y,z          |
|   | C52-H52A ...S8  | 1.080 | 3.865(1) | 2.92 | 146 | x,y,z          |
|   | C53-H53C ...N22 | 1.080 | 3.675(2) | 2.68 | 153 | x,y,z          |
|   | C41A-H41D...N15 | 1.080 | 3.386(2) | 2.44 | 145 | x,y,z          |
|   | C84A-H84D...N7  | 1.080 | 3.492(4) | 2.65 | 134 | x,y,z          |
|   | C11-H11C ...N23 | 1.080 | 3.424(2) | 2.54 | 139 | -x+2,-y+1,-z   |
|   | C88-H88C ...N2  | 1.080 | 3.533(2) | 2.57 | 148 | -x+2,-y+1,-z   |
|   | C54-H54A ...S3  | 1.080 | 3.781(2) | 2.76 | 158 | -x+1,-y+1,-z+1 |
|   | C33-H33C ...N14 | 1.080 | 3.732(3) | 2.74 | 152 | -x+1,-y+1,-z+1 |
|   | C33-H33C ...N15 | 1.080 | 3.660(3) | 2.71 | 147 | -x+1,-y+1,-z+1 |
|   | C22-H22C ...N21 | 1.080 | 3.595(2) | 2.71 | 139 | -x,-y+1,-z+1   |
|   | C21-H21E ...N6  | 1.080 | 3.659(2) | 2.67 | 152 | -x,-y+1,-z+1   |
|   | C63-H63B ...N9  | 1.080 | 3.508(2) | 2.66 | 135 | x,+y-1,+z      |
|   | N18-H18B ...N8  | 1.030 | 3.067(1) | 2.04 | 174 | x,+y-1,+z      |
|   | C62-H62A ...N4  | 1.080 | 3.644(2) | 2.62 | 158 | x,+y-1,+z      |
|   | N6-H6A ...N23   | 1.030 | 2.932(2) | 1.90 | 176 | x,+y-1,+z      |
|   | C62-H62B ...N3  | 1.080 | 3.672(2) | 2.69 | 151 | x,+y-1,+z      |
|   | N21-H21A ...N2  | 1.030 | 2.979(2) | 1.95 | 179 | x,+y-1,+z      |
|   | C43-H43C ...N12 | 1.080 | 3.774(2) | 2.73 | 163 | -x+1,-y+1,-z   |
|   | C66-H66C ...N12 | 1.080 | 3.614(3) | 2.68 | 144 | -x+1,-y+1,-z   |
|   | C43-H43A ...S6  | 1.080 | 3.912(2) | 2.86 | 164 | -x+1,-y+1,-z   |
|   | C86-H86C...N6   | 1.080 | 3.494(2) | 2.52 | 150 | x+1,+y,+z      |
|   | N3-H3B ...N20   | 1.030 | 3.152(2) | 2.12 | 176 | x+1,+y,+z      |
|   | C87-H87A ...S4  | 1.080 | 3.754(2) | 2.85 | 141 | x+1,+y,+z      |
|   | N24-H24A ...N5  | 1.030 | 3.091(2) | 2.06 | 176 | x+1,+y,+z      |



|   |                         |       |          |      |     |                     |
|---|-------------------------|-------|----------|------|-----|---------------------|
|   | C10-H10A ...S6          | 1.080 | 3.723(2) | 2.83 | 140 | $x+1,+y,+z$         |
|   | N24-H24B ...N10         | 1.030 | 3.277(2) | 2.42 | 141 | $x+1,+y,+z$         |
|   | N3-H3A ...N16           | 1.030 | 3.251(2) | 2.36 | 145 | $x+1,+y,+z$         |
|   | C8-H8A ...N21           | 1.080 | 3.516(2) | 2.64 | 138 | $x+1,+y,+z$         |
|   | C76-H76C ...N21         | 1.080 | 3.760(3) | 2.68 | 176 | $-x,-y,-z+1$        |
|   | N9-H9D ...N17           | 1.030 | 2.999(1) | 1.99 | 167 | $x,+y+1,+z$         |
|   | C31-H31B ...N1          | 1.080 | 3.725(2) | 2.69 | 160 | $x,+y+1,+z$         |
|   | C11-H11A ...C5          | 0.980 | 3.584(2) | 2.87 | 131 | $-x+2,-y,-z$        |
|   | C65-H65A ...C39         | 0.980 | 3.588(3) | 2.86 | 132 | $-x+1,-y+1,-z$      |
|   | C43-H43A ...C61         | 0.980 | 3.588(2) | 2.87 | 131 | $-x+1,-y+1,-z$      |
|   | C64-H64C ...C67         | 0.980 | 3.577(2) | 2.73 | 145 | $x,y,z$             |
|   | C21-H21C ...C72         | 0.980 | 3.564(2) | 2.81 | 134 | $-x,-y+1,-z+1$      |
|   | C22 -H22C ...C68        | 0.980 | 3.529(2) | 2.84 | 128 | $-x,-y+1,-z+1$      |
|   | C76-H76A ...C17         | 0.980 | 3.675(2) | 2.88 | 139 | $-x,-y+1,-z+1$      |
|   | C22-H22A ...C53         | 0.980 | 3.842(2) | 2.87 | 170 | $-x+1,-y+1,-z+1$    |
|   | C88-H88C ...C22         | 0.980 | 3.348(2) | 2.86 | 112 | $x-1,+y,+z+1$       |
|   | C33-H33C ...C46         | 0.980 | 3.561(3) | 2.70 | 147 | $-x+1,-y+1,-z+1$    |
| 6 | C13-H13...N3            | 1.080 | 3.681(3) | 2.69 | 153 | $-x+1,-y+2,-z+1$    |
|   | N3-H3A...N2             | 1.030 | 3.017(3) | 1.99 | 171 | $-x+1,-y+2,-z+1$    |
|   | C10-H10...N1            | 1.080 | 3.593(3) | 2.64 | 146 | $-x,-y+1,-z+2$      |
|   | C14-H14A...N1           | 1.080 | 3.725(3) | 2.73 | 153 | $-x+1,-y+1,-z+1$    |
|   | C11-H11...N1            | 1.080 | 3.262(4) | 2.47 | 129 | $x-1,y,z$           |
|   | C14-H14A... $\pi$ (C6)  | 0.980 | 3.812(2) | 2.80 | 155 | $-x+1,-y+1,-z+1$    |
| 7 | N3-H3A...N2             | 1.030 | 3.150(2) | 2.12 | 173 | $-x,-y+1,-z$        |
|   | C15-H15A...N1           | 1.080 | 3.466(2) | 2.63 | 133 | $x,-y+1/2,z-1/2$    |
|   | N3-H3B...N1             | 1.030 | 3.226(2) | 2.27 | 154 | $x,-y+1/2,z-1/2$    |
|   | C12-H12...S1            | 1.080 | 3.910(1) | 2.87 | 162 | $x,y+1,z$           |
|   | C14-H14A...N3           | 1.080 | 3.546(3) | 2.53 | 157 | $x,-y+1/2+1,z+1/2$  |
|   | C15-H15A... $\pi$ (C9)  | 0.980 | 3.610(2) | 2.92 | 128 | $x,-y+1/2,z-1/2$    |
|   | C14-H14A... $\pi$ (C2)  | 0.866 | 3.787(3) | 2.92 | 172 | $x,-y+1/2,z-1/2$    |
|   | C9-H9... $\pi$ (C9)     | 0.950 | 3.400(1) | 2.67 | 134 | $-x,-y+1,-z+1$      |
|   | C7-H7A... $\pi$ (C13)   | 0.990 | 2.539(2) | 2.89 | 115 | $-x,y+1/2,-z+1/2$   |
|   | C16-H16B... $\pi$ (C13) | 0.980 | 3.890(2) | 2.97 | 156 | $-x+1,y-1/2,-z+1/2$ |
| 9 | N3-H3...O1              | 1.030 | 3.038(2) | 2.23 | 134 | $x,-y+1/2,z-1/2$    |
|   | C16-H16C...O1           | 1.080 | 3.593(3) | 2.60 | 153 | $x,-y+1/2,z-1/2$    |
|   | C15-H15A...O1           | 1.080 | 3.587(3) | 2.60 | 152 | $x,-y+1/2,z-1/2$    |
|   | C18-H18C...N2           | 1.080 | 3.525(3) | 2.66 | 137 | $x,-y+1/2,z+1/2$    |

|                   |                          |          |          |      |                 |                     |
|-------------------|--------------------------|----------|----------|------|-----------------|---------------------|
|                   | C19-H19C... $\pi$ (C8)   | 0.980    | 3.606(3) | 2.74 | 147             | -x+1, y+1/2, -z+1/2 |
|                   | C19-H19C... $\pi$ (C7)   | 0.980    | 3.814(2) | 2.85 | 166             | -x+1, y+1/2, -z+1/2 |
| 10                | C17-H17A...F2            | 1.080    | 3.214(7) | 2.58 | 117             | x, y, z             |
|                   | C36-H36A...F1            | 1.080    | 3.468(7) | 2.57 | 141             | x, y, z             |
|                   | C35-H35C...F1            | 1.080    | 3.593(8) | 2.69 | 141             | x, y, z             |
|                   | C36-H36B...F1            | 1.080    | 3.409(7) | 2.53 | 138             | x-1/2, -y+1, z      |
|                   | C36-H36C...N5            | 1.080    | 3.699(8) | 2.63 | 169             | x-1/2, -y+1, z      |
|                   | C9-H9...O2               | 1.080    | 3.478(7) | 2.43 | 163             | x-1/2, -y+1, z      |
|                   | C16-H16A...N2            | 1.080    | 3.425(7) | 2.67 | 127             | x-1/2, -y+2, z      |
|                   | C17-H17C...O1            | 1.080    | 3.559(7) | 2.56 | 154             | x-1/2, -y+2, z      |
|                   | N3-H3...O1               | 1.030    | 2.861(6) | 1.90 | 153             | x-1/2, -y+2, z      |
|                   | C31-H31... $\pi$ (C12)   | 0.950    | 3.627(8) | 2.86 | 138             | -x+1/2+1, y, z-1/2  |
|                   | C12-H12... $\pi$ (C31)   | 0.950    | 3.627(8) | 2.80 | 145             | -x+1/2+1, y, z-1/2  |
|                   | C38-H38A ... $\pi$ (C10) | 0.980    | 3.626(8) | 2.74 | 151             | -x+1, -y+1, z+1/2   |
|                   | C38-H38A... $\pi$ (C11)  | 0.980    | 3.699(8) | 2.87 | 142             | -x+1, -y+1, z-1/2   |
|                   | S1... $\pi$ (C3)         | -        | 3.528(5) | -    | -               | x-1/2, -y+2, +z     |
|                   | S2... $\pi$ (C20)        | -        | 3.612(5) | -    | -               | x+1/2, -y+1, +z     |
| S2... $\pi$ (C22) | -                        | 3.642(5) | -        | -    | x+1/2, -y+1, +z |                     |
| 11                | C24-H24...N2             | 1.080    | 3.476(4) | 2.62 | 136             | x, y, z             |
|                   | C12-H12...O2             | 1.080    | 3.196(2) | 2.36 | 133             | -x+1, -y+1, -z+1    |
|                   | C14-H14...O3             | 1.080    | 3.289(4) | 2.48 | 130             | -x, y-1/2, -z+1/2   |
|                   | C15-H15...O1             | 1.080    | 3.393(3) | 2.52 | 137             | -x, y-1/2, -z+1/2   |
|                   | C23-H23...O2             | 1.080    | 3.340(4) | 2.50 | 139             | x, -y+1/2, z-1/2    |
|                   | C10-H10...O4             | 1.080    | 3.535(3) | 2.62 | 142             | -x+1, y-1/2, -z+1/2 |
|                   | C16-H16...O4             | 1.080    | 3.459(3) | 2.45 | 154             | x, y-1, z           |
|                   | C9-H9...N1               | 1.080    | 3.345(4) | 2.52 | 132             | -x+1, y-1/2, -z+1/2 |
|                   | C9-H9... $\pi$ (C12)     | 1.080    | 3.724(2) | 2.74 | 154             | -x+1, y-1/2, -z+1/2 |
|                   | C9-H9... $\pi$ (C7)      | 1.080    | 2.413(3) | 2.80 | 138             | -x+1, y-1/2, -z+1/2 |
|                   | C9-H9... $\pi$ (C1)      | 1.080    | 3.765(4) | 2.80 | 130             | -x+1, y-1/2, -z+1/2 |
|                   | S1... $\pi$ (C7)         | -        | 3.556(5) | -    | -               | -x+1, -y+1, -z+1    |

**Table S5:** Total interaction energies of molecules (in kJ/mol), R is the distance between molecular centroids (mean atomic position in Å). Scale factors for the energy model from *Crystal Explorer21.5* is given below.

### Compound 2

|  | N | Symop             | R     | Electron Density | E_ele | E_pol | E_dis | E_rep | E_tot |
|--|---|-------------------|-------|------------------|-------|-------|-------|-------|-------|
|  | 1 | -x, -y, -z        | 7.80  | B3LYP/6-31G(d,p) | -73.6 | -17.5 | -23.5 | 79.5  | -62.1 |
|  | 1 | x, y, z           | 8.22  | B3LYP/6-31G(d,p) | -1.6  | -1.2  | -12.8 | 9.0   | -8.2  |
|  | 1 | x, -y+1/2, z+1/2  | 10.50 | B3LYP/6-31G(d,p) | -2.2  | -0.3  | -8.2  | 6.0   | -6.0  |
|  | 0 | -x, -y, -z        | 10.82 | B3LYP/6-31G(d,p) | -1.5  | -0.2  | -7.2  | 5.8   | -4.3  |
|  | 0 | -x, -y, -z        | 4.36  | B3LYP/6-31G(d,p) | -17.9 | -3.3  | -60.3 | 38.3  | -50.2 |
|  | 1 | x, -y+1/2, z+1/2  | 7.17  | B3LYP/6-31G(d,p) | -21.0 | -3.8  | -19.8 | 25.9  | -26.2 |
|  | 0 | -x, y+1/2, -z+1/2 | 9.96  | B3LYP/6-31G(d,p) | 1.9   | -0.3  | -1.8  | 0.0   | 0.2   |
|  | 0 | -x, y+1/2, -z+1/2 | 6.79  | B3LYP/6-31G(d,p) | 2.5   | -0.9  | -8.1  | 2.1   | -3.8  |
|  | 2 | -x, y+1/2, -z+1/2 | 8.89  | B3LYP/6-31G(d,p) | -0.2  | -0.5  | -10.0 | 5.6   | -5.9  |
|  | 1 | -x, -y, -z        | 4.87  | B3LYP/6-31G(d,p) | -19.3 | -3.1  | -50.4 | 43.2  | -39.9 |

| Energy Model        | $k_{ele}$ | $k_{Dis}$ | $k_{Pol}$ | $k_{Rep}$ |
|---------------------|-----------|-----------|-----------|-----------|
| CE-B3LYP/6-31G(d,p) | 1.057     | 0.871     | 0.740     | 0.618     |

## Compound 3

### PURPLE

| N | Symp                  | R     | Electron Density | E_ele | E_pol | E_dis | E_rep | E_tot |
|---|-----------------------|-------|------------------|-------|-------|-------|-------|-------|
| 0 | -                     | 7.61  | B3LYP/6-31G(d,p) | -78.4 | -19.0 | -26.5 | 91.2  | -63.7 |
| 1 | -                     | 7.70  | B3LYP/6-31G(d,p) | -1.4  | -0.9  | -22.0 | 13.1  | -13.2 |
| 0 | -                     | 6.94  | B3LYP/6-31G(d,p) | -30.5 | -7.7  | -29.4 | 40.1  | -38.8 |
| 1 | -                     | 8.37  | B3LYP/6-31G(d,p) | 0.2   | -1.0  | -9.6  | 3.6   | -6.7  |
| 0 | -                     | 10.02 | B3LYP/6-31G(d,p) | -2.2  | -0.3  | -10.4 | 6.9   | -7.4  |
| 0 | -x+1/2, y+1/2, -z+1/2 | 8.82  | B3LYP/6-31G(d,p) | -0.8  | -0.2  | -5.9  | 2.1   | -4.8  |
| 0 | -                     | 4.59  | B3LYP/6-31G(d,p) | -3.6  | -4.1  | -57.7 | 39.4  | -32.8 |
| 0 | -                     | 6.06  | B3LYP/6-31G(d,p) | -8.3  | -2.4  | -20.9 | 28.4  | -11.2 |
| 0 | -                     | 8.30  | B3LYP/6-31G(d,p) | -2.3  | -0.6  | -5.7  | 3.4   | -5.7  |
| 1 | -                     | 4.35  | B3LYP/6-31G(d,p) | -18.2 | -3.7  | -68.0 | 43.1  | -54.5 |
| 0 | -x, -y, -z            | 6.03  | B3LYP/6-31G(d,p) | -9.2  | -2.4  | -26.1 | 9.4   | -28.4 |
| 1 | -                     | 8.22  | B3LYP/6-31G(d,p) | -2.8  | -0.6  | -5.9  | 3.9   | -6.1  |
| 0 | -                     | 10.01 | B3LYP/6-31G(d,p) | -2.4  | -0.2  | -8.8  | 6.5   | -6.4  |
| 0 | -                     | 9.89  | B3LYP/6-31G(d,p) | 2.4   | -0.6  | -5.7  | 1.9   | -1.7  |
| 0 | -                     | 12.55 | B3LYP/6-31G(d,p) | 0.2   | -0.1  | -2.7  | 0.0   | -2.2  |
| 1 | -                     | 6.97  | B3LYP/6-31G(d,p) | -25.0 | -5.5  | -28.7 | 35.4  | -33.6 |
| 0 | x+1/2, -y+1/2, z+1/2  | 10.09 | B3LYP/6-31G(d,p) | -1.6  | -0.3  | -10.1 | 6.6   | -6.7  |
| 0 | -x+1/2, y+1/2, -z+1/2 | 8.91  | B3LYP/6-31G(d,p) | -1.5  | -0.3  | -5.8  | 5.2   | -3.6  |
| 1 | -                     | 7.64  | B3LYP/6-31G(d,p) | -10.1 | -1.4  | -24.2 | 20.3  | -20.2 |
| 0 | -                     | 7.66  | B3LYP/6-31G(d,p) | -2.8  | -1.1  | -23.1 | 15.9  | -14.1 |
| 0 | -x, -y, -z            | 11.81 | B3LYP/6-31G(d,p) | -0.1  | -0.1  | -1.7  | 0.1   | -1.7  |
| 0 | -                     | 8.21  | B3LYP/6-31G(d,p) | 1.3   | -1.0  | -11.4 | 4.5   | -6.6  |

### ORANGE

| N | Symp                  | R     | Electron Density | E_ele | E_pol | E_dis | E_rep | E_tot |
|---|-----------------------|-------|------------------|-------|-------|-------|-------|-------|
| 0 | -                     | 7.61  | B3LYP/6-31G(d,p) | -78.4 | -19.0 | -26.5 | 91.2  | -63.7 |
| 1 | -                     | 7.70  | B3LYP/6-31G(d,p) | -1.4  | -0.9  | -22.0 | 13.1  | -13.2 |
| 0 | -                     | 6.94  | B3LYP/6-31G(d,p) | -30.5 | -7.7  | -29.4 | 40.1  | -38.8 |
| 1 | -                     | 8.37  | B3LYP/6-31G(d,p) | 0.2   | -1.0  | -9.6  | 3.6   | -6.7  |
| 0 | -                     | 10.02 | B3LYP/6-31G(d,p) | -2.2  | -0.3  | -10.4 | 6.9   | -7.4  |
| 0 | -x+1/2, y+1/2, -z+1/2 | 8.82  | B3LYP/6-31G(d,p) | -0.8  | -0.2  | -5.9  | 2.1   | -4.8  |
| 0 | -                     | 4.59  | B3LYP/6-31G(d,p) | -3.6  | -4.1  | -57.7 | 39.4  | -32.8 |
| 0 | -                     | 6.06  | B3LYP/6-31G(d,p) | -8.3  | -2.4  | -20.9 | 28.4  | -11.2 |
| 0 | -                     | 8.30  | B3LYP/6-31G(d,p) | -2.3  | -0.6  | -5.7  | 3.4   | -5.7  |
| 0 | -                     | 4.35  | B3LYP/6-31G(d,p) | -18.2 | -3.7  | -68.0 | 43.1  | -54.5 |
| 0 | -x, -y, -z            | 6.03  | B3LYP/6-31G(d,p) | -9.2  | -2.4  | -26.1 | 9.4   | -28.4 |
| 0 | -                     | 8.22  | B3LYP/6-31G(d,p) | -2.8  | -0.6  | -5.9  | 3.9   | -6.1  |
| 0 | -                     | 10.01 | B3LYP/6-31G(d,p) | -2.4  | -0.2  | -8.8  | 6.5   | -6.4  |
| 0 | -                     | 9.89  | B3LYP/6-31G(d,p) | 2.4   | -0.6  | -5.7  | 1.9   | -1.7  |
| 0 | -                     | 12.55 | B3LYP/6-31G(d,p) | 0.2   | -0.1  | -2.7  | 0.0   | -2.2  |

### GREY

| N | Symp                  | R     | Electron Density | E_ele | E_pol | E_dis | E_rep | E_tot |
|---|-----------------------|-------|------------------|-------|-------|-------|-------|-------|
| 0 | -                     | 7.61  | B3LYP/6-31G(d,p) | -78.4 | -19.0 | -26.5 | 91.2  | -63.7 |
| 0 | -                     | 7.70  | B3LYP/6-31G(d,p) | -1.4  | -0.9  | -22.0 | 13.1  | -13.2 |
| 1 | -                     | 6.94  | B3LYP/6-31G(d,p) | -30.5 | -7.7  | -29.4 | 40.1  | -38.8 |
| 0 | -                     | 8.37  | B3LYP/6-31G(d,p) | 0.2   | -1.0  | -9.6  | 3.6   | -6.7  |
| 1 | -                     | 10.02 | B3LYP/6-31G(d,p) | -2.2  | -0.3  | -10.4 | 6.9   | -7.4  |
| 0 | -x+1/2, y+1/2, -z+1/2 | 8.82  | B3LYP/6-31G(d,p) | -0.8  | -0.2  | -5.9  | 2.1   | -4.8  |
| 0 | -                     | 4.59  | B3LYP/6-31G(d,p) | -3.6  | -4.1  | -57.7 | 39.4  | -32.8 |
| 1 | -                     | 6.06  | B3LYP/6-31G(d,p) | -8.3  | -2.4  | -20.9 | 28.4  | -11.2 |
| 0 | -                     | 8.30  | B3LYP/6-31G(d,p) | -2.3  | -0.6  | -5.7  | 3.4   | -5.7  |
| 0 | -                     | 4.35  | B3LYP/6-31G(d,p) | -18.2 | -3.7  | -68.0 | 43.1  | -54.5 |
| 0 | -x, -y, -z            | 6.03  | B3LYP/6-31G(d,p) | -9.2  | -2.4  | -26.1 | 9.4   | -28.4 |
| 0 | -                     | 8.22  | B3LYP/6-31G(d,p) | -2.8  | -0.6  | -5.9  | 3.9   | -6.1  |
| 0 | -                     | 10.01 | B3LYP/6-31G(d,p) | -2.4  | -0.2  | -8.8  | 6.5   | -6.4  |
| 0 | -                     | 9.89  | B3LYP/6-31G(d,p) | 2.4   | -0.6  | -5.7  | 1.9   | -1.7  |
| 0 | -                     | 12.55 | B3LYP/6-31G(d,p) | 0.2   | -0.1  | -2.7  | 0.0   | -2.2  |
| 1 | -                     | 6.97  | B3LYP/6-31G(d,p) | -25.0 | -5.5  | -28.7 | 35.4  | -33.6 |
| 0 | x+1/2, -y+1/2, z+1/2  | 10.09 | B3LYP/6-31G(d,p) | -1.6  | -0.3  | -10.1 | 6.6   | -6.7  |
| 0 | -x+1/2, y+1/2, -z+1/2 | 8.91  | B3LYP/6-31G(d,p) | -1.5  | -0.3  | -5.8  | 5.2   | -3.6  |
| 1 | -                     | 7.64  | B3LYP/6-31G(d,p) | -10.1 | -1.4  | -24.2 | 20.3  | -20.2 |
| 1 | -                     | 7.66  | B3LYP/6-31G(d,p) | -2.8  | -1.1  | -23.1 | 15.9  | -14.1 |
| 0 | -x, -y, -z            | 11.81 | B3LYP/6-31G(d,p) | -0.1  | -0.1  | -1.7  | 0.1   | -1.7  |
| 1 | -                     | 8.21  | B3LYP/6-31G(d,p) | 1.3   | -1.0  | -11.4 | 4.5   | -6.6  |
| 0 | -x+1/2, y+1/2, -z+1/2 | 8.82  | B3LYP/6-31G(d,p) | -1.5  | -0.3  | -6.9  | 4.6   | -4.9  |
| 0 | -x, -y, -z            | 7.68  | B3LYP/6-31G(d,p) | -67.9 | -16.5 | -24.8 | 71.1  | -61.7 |
| 0 | -x, -y, -z            | 12.63 | B3LYP/6-31G(d,p) | 0.9   | -0.1  | -2.5  | 0.0   | -1.3  |
| 0 | x+1/2, -y+1/2, z+1/2  | 10.03 | B3LYP/6-31G(d,p) | -2.3  | -0.3  | -9.0  | 6.3   | -6.5  |

## Compound 6

| N | Symp       | R     | Electron Density | E_ele | E_pol | E_dis | E_rep | E_tot |
|---|------------|-------|------------------|-------|-------|-------|-------|-------|
| 0 | -x, -y, -z | 7.18  | B3LYP/6-31G(d,p) | -53.0 | -11.9 | -32.7 | 73.7  | -47.9 |
| 1 | x, y, z    | 7.78  | B3LYP/6-31G(d,p) | -4.6  | -1.3  | -21.6 | 18.2  | -13.4 |
| 1 | -x, -y, -z | 7.67  | B3LYP/6-31G(d,p) | -10.9 | -2.6  | -36.4 | 34.9  | -23.6 |
| 0 | x, y, z    | 10.98 | B3LYP/6-31G(d,p) | -2.3  | -0.6  | -9.3  | 5.7   | -7.4  |
| 0 | -x, -y, -z | 9.69  | B3LYP/6-31G(d,p) | -3.4  | -2.0  | -34.6 | 24.6  | -20.1 |
| 0 | -x, -y, -z | 13.78 | B3LYP/6-31G(d,p) | -0.5  | -0.0  | -1.2  | 0.0   | -1.6  |
| 1 | x, y, z    | 11.17 | B3LYP/6-31G(d,p) | 0.9   | -0.3  | -8.3  | 4.2   | -3.9  |
| 1 | x, y, z    | 8.22  | B3LYP/6-31G(d,p) | -2.7  | -1.0  | -11.3 | 5.0   | -10.3 |
| 0 | -x, -y, -z | 4.96  | B3LYP/6-31G(d,p) | -28.6 | -9.7  | -92.9 | 63.0  | -79.5 |
| 1 | -x, -y, -z | 6.99  | B3LYP/6-31G(d,p) | 0.6   | -0.7  | -10.7 | 3.6   | -6.9  |
| 1 | -x, -y, -z | 9.34  | B3LYP/6-31G(d,p) | 0.7   | -0.1  | -2.4  | 0.0   | -1.4  |
| 0 | -x, -y, -z | 13.51 | B3LYP/6-31G(d,p) | -0.7  | -0.2  | -7.1  | 0.0   | -7.0  |
| 1 | -x, -y, -z | 8.82  | B3LYP/6-31G(d,p) | -11.5 | -1.9  | -39.5 | 22.6  | -34.0 |

## Compound 7

| N | Symp              | R     | Electron Density | E_ele | E_pol | E_dis | E_rep | E_tot |
|---|-------------------|-------|------------------|-------|-------|-------|-------|-------|
| 1 | -x, -y, -z        | 7.60  | B3LYP/6-31G(d,p) | -56.1 | -12.5 | -28.3 | 57.5  | -57.6 |
| 2 | -x, y+1/2, -z+1/2 | 7.11  | B3LYP/6-31G(d,p) | -1.7  | 0.0   | -37.5 | 21.4  | -21.3 |
| 0 | x, -y+1/2, z+1/2  | 7.30  | B3LYP/6-31G(d,p) | -35.0 | -8.6  | -51.2 | 50.2  | -56.9 |
| 1 | -x, -y, -z        | 10.29 | B3LYP/6-31G(d,p) | -6.0  | -0.3  | -17.9 | 25.1  | -6.6  |
| 0 | -x, -y, -z        | 12.89 | B3LYP/6-31G(d,p) | -1.7  | -0.4  | -11.1 | 0.0   | -11.8 |
| 0 | -x, y+1/2, -z+1/2 | 7.76  | B3LYP/6-31G(d,p) | -8.1  | -1.6  | -26.6 | 12.4  | -25.3 |
| 1 | x, y, z           | 9.73  | B3LYP/6-31G(d,p) | -1.4  | -0.5  | -7.4  | 8.6   | -3.0  |
| 2 | x, -y+1/2, z+1/2  | 10.19 | B3LYP/6-31G(d,p) | -4.8  | -0.4  | -16.7 | 12.7  | -12.1 |
| 0 | -x, -y, -z        | 7.81  | B3LYP/6-31G(d,p) | -7.0  | -1.4  | -24.5 | 27.8  | -12.6 |
| 0 | -x, -y, -z        | 14.36 | B3LYP/6-31G(d,p) | -0.2  | -0.0  | -1.1  | 0.0   | -1.2  |

## Compound 10

### ORANGE

| N | Symop            | R     | Electron Density | E_ele | E_pol | E_dis | E_rep | E_tot |
|---|------------------|-------|------------------|-------|-------|-------|-------|-------|
| 1 | -                | 9.28  | B3LYP/6-31G(d,p) | -3.5  | -1.5  | -23.3 | 13.2  | -16.9 |
| 0 | x+1/2, -y, z     | 4.88  | B3LYP/6-31G(d,p) | -43.2 | -12.1 | -91.1 | 85.8  | -81.0 |
| 1 | -                | 11.06 | B3LYP/6-31G(d,p) | -5.7  | -2.0  | -13.6 | 12.1  | -11.8 |
| 1 | -                | 12.04 | B3LYP/6-31G(d,p) | 0.0   | -0.5  | -15.2 | 0.0   | -13.6 |
| 0 | -x+1/2, y, z+1/2 | 11.10 | B3LYP/6-31G(d,p) | -0.2  | -0.3  | -9.0  | 4.0   | -5.8  |
| 0 | -                | 10.83 | B3LYP/6-31G(d,p) | -2.8  | -0.6  | -19.8 | 12.6  | -12.9 |
| 1 | -                | 10.18 | B3LYP/6-31G(d,p) | -9.5  | -1.5  | -26.2 | 26.4  | -17.7 |
| 0 | -x, -y, z+1/2    | 11.01 | B3LYP/6-31G(d,p) | -2.2  | -0.3  | -6.7  | 4.5   | -5.7  |
| 0 | -                | 11.21 | B3LYP/6-31G(d,p) | -4.9  | -0.7  | -20.3 | 14.2  | -14.6 |
| 0 | -                | 11.83 | B3LYP/6-31G(d,p) | -1.8  | -0.4  | -11.6 | 5.4   | -9.0  |
| 0 | -                | 12.17 | B3LYP/6-31G(d,p) | -0.4  | -0.5  | -8.1  | 0.0   | -7.8  |
| 1 | -                | 13.06 | B3LYP/6-31G(d,p) | 2.6   | -0.4  | -10.3 | 0.0   | -6.5  |
| 1 | -                | 12.37 | B3LYP/6-31G(d,p) | 0.5   | -0.2  | -15.6 | 0.0   | -13.3 |
| 1 | -                | 12.88 | B3LYP/6-31G(d,p) | -0.3  | -0.1  | -2.0  | 0.0   | -2.1  |
| 1 | -                | 13.73 | B3LYP/6-31G(d,p) | -0.3  | -0.1  | -1.9  | 0.0   | -2.0  |
| 1 | x+1/2, -y, z     | 4.44  | B3LYP/6-31G(d,p) | -22.3 | -5.1  | -98.8 | 61.9  | -75.2 |
| 0 | -x+1/2, y, z+1/2 | 11.00 | B3LYP/6-31G(d,p) | -1.5  | -0.4  | -10.2 | 7.8   | -5.9  |

### GREY

| N | Symop            | R     | Electron Density | E_ele | E_pol | E_dis | E_rep | E_tot |
|---|------------------|-------|------------------|-------|-------|-------|-------|-------|
| 1 | -                | 9.28  | B3LYP/6-31G(d,p) | -3.5  | -1.5  | -23.3 | 13.2  | -16.9 |
| 1 | x+1/2, -y, z     | 4.88  | B3LYP/6-31G(d,p) | -43.2 | -12.1 | -91.1 | 85.8  | -81.0 |
| 0 | -                | 11.06 | B3LYP/6-31G(d,p) | -5.7  | -2.0  | -13.6 | 12.1  | -11.8 |
| 0 | -                | 12.04 | B3LYP/6-31G(d,p) | 0.0   | -0.5  | -15.2 | 0.0   | -13.6 |
| 2 | -x+1/2, y, z+1/2 | 11.10 | B3LYP/6-31G(d,p) | -0.2  | -0.3  | -9.0  | 4.0   | -5.8  |
| 0 | -                | 10.83 | B3LYP/6-31G(d,p) | -2.8  | -0.6  | -19.8 | 12.6  | -12.9 |
| 1 | -                | 10.18 | B3LYP/6-31G(d,p) | -9.5  | -1.5  | -26.2 | 26.4  | -17.7 |
| 0 | -x, -y, z+1/2    | 11.01 | B3LYP/6-31G(d,p) | -2.2  | -0.3  | -6.7  | 4.5   | -5.7  |
| 1 | -                | 11.21 | B3LYP/6-31G(d,p) | -4.9  | -0.7  | -20.3 | 14.2  | -14.6 |
| 0 | -                | 11.83 | B3LYP/6-31G(d,p) | -1.8  | -0.4  | -11.6 | 5.4   | -9.0  |
| 1 | -                | 12.17 | B3LYP/6-31G(d,p) | -0.4  | -0.5  | -8.1  | 0.0   | -7.8  |
| 1 | -                | 13.06 | B3LYP/6-31G(d,p) | 2.6   | -0.4  | -10.3 | 0.0   | -6.5  |
| 1 | -                | 12.37 | B3LYP/6-31G(d,p) | 0.5   | -0.2  | -15.6 | 0.0   | -13.3 |
| 1 | -                | 12.88 | B3LYP/6-31G(d,p) | -0.3  | -0.1  | -2.0  | 0.0   | -2.1  |
| 1 | -                | 13.73 | B3LYP/6-31G(d,p) | -0.3  | -0.1  | -1.9  | 0.0   | -2.0  |

## Compound 9

| N | Symop             | R     | Electron Density | E_ele | E_pol | E_dis | E_rep | E_tot |
|---|-------------------|-------|------------------|-------|-------|-------|-------|-------|
| 1 | x, -y+1/2, z+1/2  | 5.42  | B3LYP/6-31G(d,p) | -32.8 | -9.6  | -85.2 | 65.5  | -75.5 |
| 1 | -x, -y, -z        | 13.29 | B3LYP/6-31G(d,p) | 1.5   | -0.6  | -12.5 | 0.0   | -9.8  |
| 0 | -x, y+1/2, -z+1/2 | 9.15  | B3LYP/6-31G(d,p) | -7.5  | -1.3  | -23.6 | 17.0  | -19.0 |
| 0 | -x, -y, -z        | 12.10 | B3LYP/6-31G(d,p) | 1.8   | -0.4  | -11.3 | 0.0   | -8.2  |
| 1 | x, y, z           | 13.03 | B3LYP/6-31G(d,p) | 0.9   | -0.2  | -9.2  | 0.0   | -7.3  |
| 1 | -x, y+1/2, -z+1/2 | 10.10 | B3LYP/6-31G(d,p) | -4.2  | -1.0  | -18.9 | 7.9   | -16.7 |
| 0 | x, -y+1/2, z+1/2  | 11.46 | B3LYP/6-31G(d,p) | -3.1  | -0.8  | -17.9 | 13.1  | -11.4 |
| 1 | -x, -y, -z        | 10.43 | B3LYP/6-31G(d,p) | -3.6  | -0.3  | -15.5 | 11.2  | -10.6 |
| 0 | -x, -y, -z        | 8.87  | B3LYP/6-31G(d,p) | -0.5  | -1.3  | -28.1 | 23.7  | -11.2 |
| 0 | -x, -y, -z        | 12.41 | B3LYP/6-31G(d,p) | -1.6  | -0.3  | -6.6  | 0.0   | -7.6  |

## Compound 11

| N | Symop             | R     | Electron Density | E_ele | E_pol | E_dis  | E_rep | E_tot |
|---|-------------------|-------|------------------|-------|-------|--------|-------|-------|
| 0 | -x, -y, -z        | 7.33  | B3LYP/6-31G(d,p) | -26.6 | -5.7  | -106.8 | 87.6  | -71.2 |
| 1 | -x, -y, -z        | 13.70 | B3LYP/6-31G(d,p) | 4.1   | -1.0  | -7.9   | 0.0   | -3.3  |
| 1 | -x, y+1/2, -z+1/2 | 9.77  | B3LYP/6-31G(d,p) | -7.8  | -5.3  | -27.7  | 17.9  | -25.3 |
| 1 | -x, -y, -z        | 10.05 | B3LYP/6-31G(d,p) | -15.3 | -2.9  | -32.6  | 20.0  | -34.4 |
| 1 | x, -y+1/2, z+1/2  | 15.47 | B3LYP/6-31G(d,p) | 0.1   | -0.1  | -1.3   | 0.0   | -1.1  |
| 1 | x, -y+1/2, z+1/2  | 9.55  | B3LYP/6-31G(d,p) | -12.2 | -2.6  | -16.2  | 10.1  | -22.7 |
| 1 | x, y, z           | 9.83  | B3LYP/6-31G(d,p) | -15.0 | -3.1  | -34.1  | 20.6  | -35.1 |
| 1 | -x, y+1/2, -z+1/2 | 10.09 | B3LYP/6-31G(d,p) | -9.5  | -2.1  | -43.2  | 32.7  | -29.1 |
| 0 | x, -y+1/2, z+1/2  | 10.06 | B3LYP/6-31G(d,p) | -1.0  | -1.6  | -20.7  | 8.7   | -14.8 |
| 0 | -x, -y, -z        | 12.67 | B3LYP/6-31G(d,p) | -3.2  | -0.4  | -9.4   | 0.0   | -11.9 |

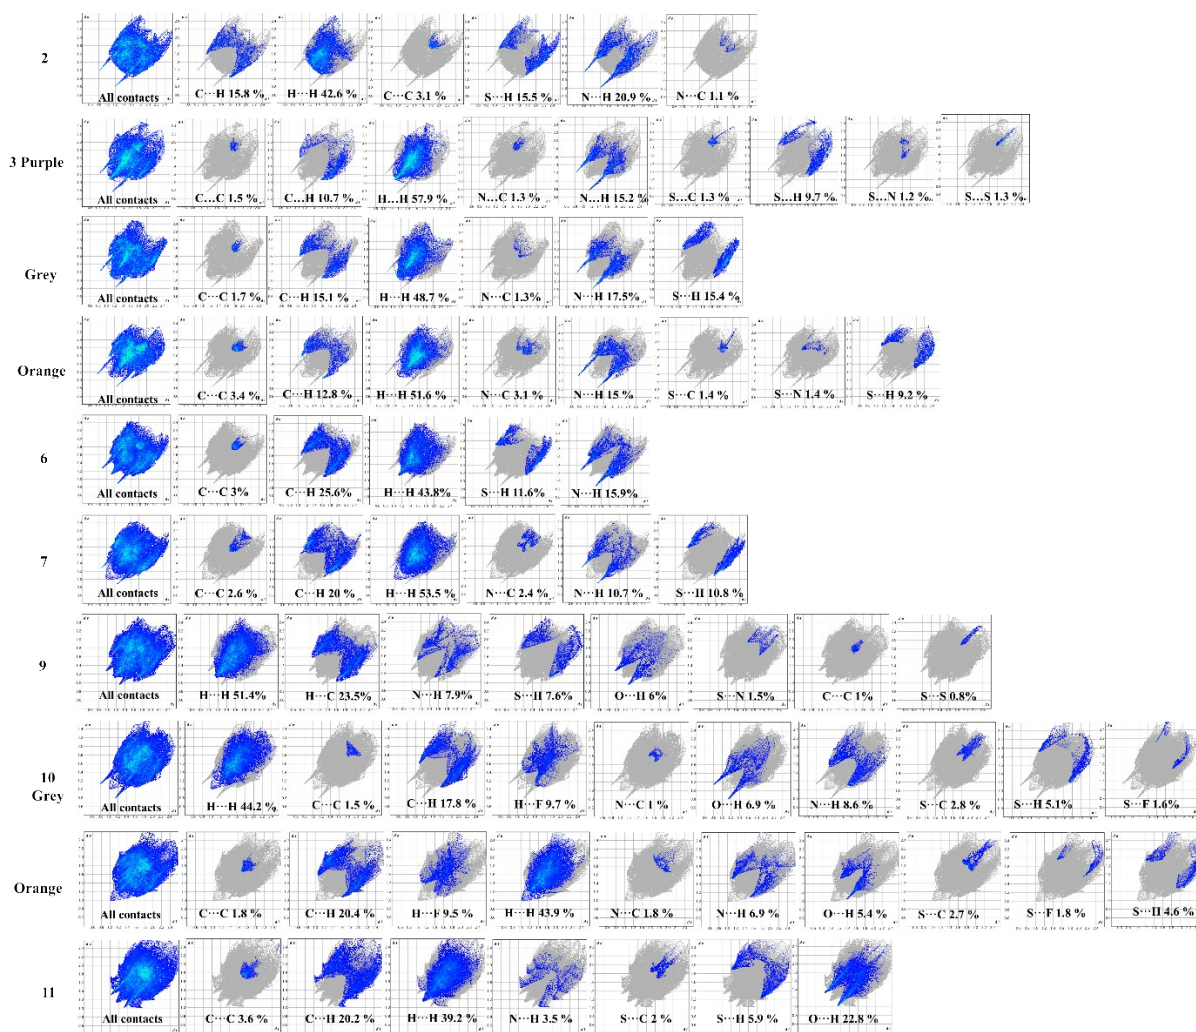

**Figure S11:** Fingerprint plots representing the percentage contribution of reciprocal contacts.

**Table S6:** Lattice energy of the compounds (in kJ/mol) calculated using *Crystal Explorer 21.5*.

| Compounds | <i>Crystal Explorer</i><br>B3LYP/6-31G(d,p)<br>(in kJ/mol) |
|-----------|------------------------------------------------------------|
| 2         | -134.4                                                     |
| 3         | -141.4                                                     |
| 6         | -157.3                                                     |
| 7         | -175.8                                                     |
| 9         | -167.1                                                     |
| 10        | -165.6                                                     |
| 11        | -191.6                                                     |

**Table S7:** Topological parameters for interaction obtained from QTAIM calculations in all eight compounds.

| Compounds Name  | Interaction       | R <sub>ij</sub> (Å) | $\rho$<br>(e/Å <sup>3</sup> ) | $\nabla^2\rho$<br>(e/Å <sup>5</sup> ) | V (au)  | G (au) | V  / G |
|-----------------|-------------------|---------------------|-------------------------------|---------------------------------------|---------|--------|--------|
| <b>2</b>        | S1···C8( $\pi$ )  | 3.196               | 0.04                          | 0.64                                  | -0.0035 | 0.0051 | 0.69   |
| <b>3</b>        | H9C···S3          | 2.899               | 0.04                          | 0.49                                  | -0.0024 | 0.0038 | 0.65   |
|                 | S2···S3           | 3.403               | 0.05                          | 0.57                                  | -0.0032 | 0.0045 | 0.70   |
| <b>6</b>        | H11···S1          | 3.159               | 0.02                          | 0.33                                  | -0.0015 | 0.0024 | 0.61   |
| <b>7</b>        | H14···S1          | 2.960               | 0.04                          | 0.49                                  | -0.0024 | 0.0037 | 0.64   |
| <b>9</b>        | H18A···S1         | 2.905               | 0.04                          | 0.53                                  | -0.0028 | 0.0041 | 0.67   |
| <b>10(GREY)</b> | S1···C3( $\pi$ )  | 3.337               | 0.04                          | 0.46                                  | -0.0030 | 0.0039 | 0.78   |
| <b>(ORANGE)</b> | S2···C20( $\pi$ ) | 3.420               | 0.04                          | 0.43                                  | -0.0027 | 0.0036 | 0.75   |
|                 | S1···C22( $\pi$ ) | 3.479               | 0.04                          | 0.41                                  | -0.0026 | 0.0034 | 0.77   |
| <b>11</b>       | S1···C7( $\pi$ )  | 3.369               | 0.04                          | 0.44                                  | -0.0028 | 0.0037 | 0.77   |

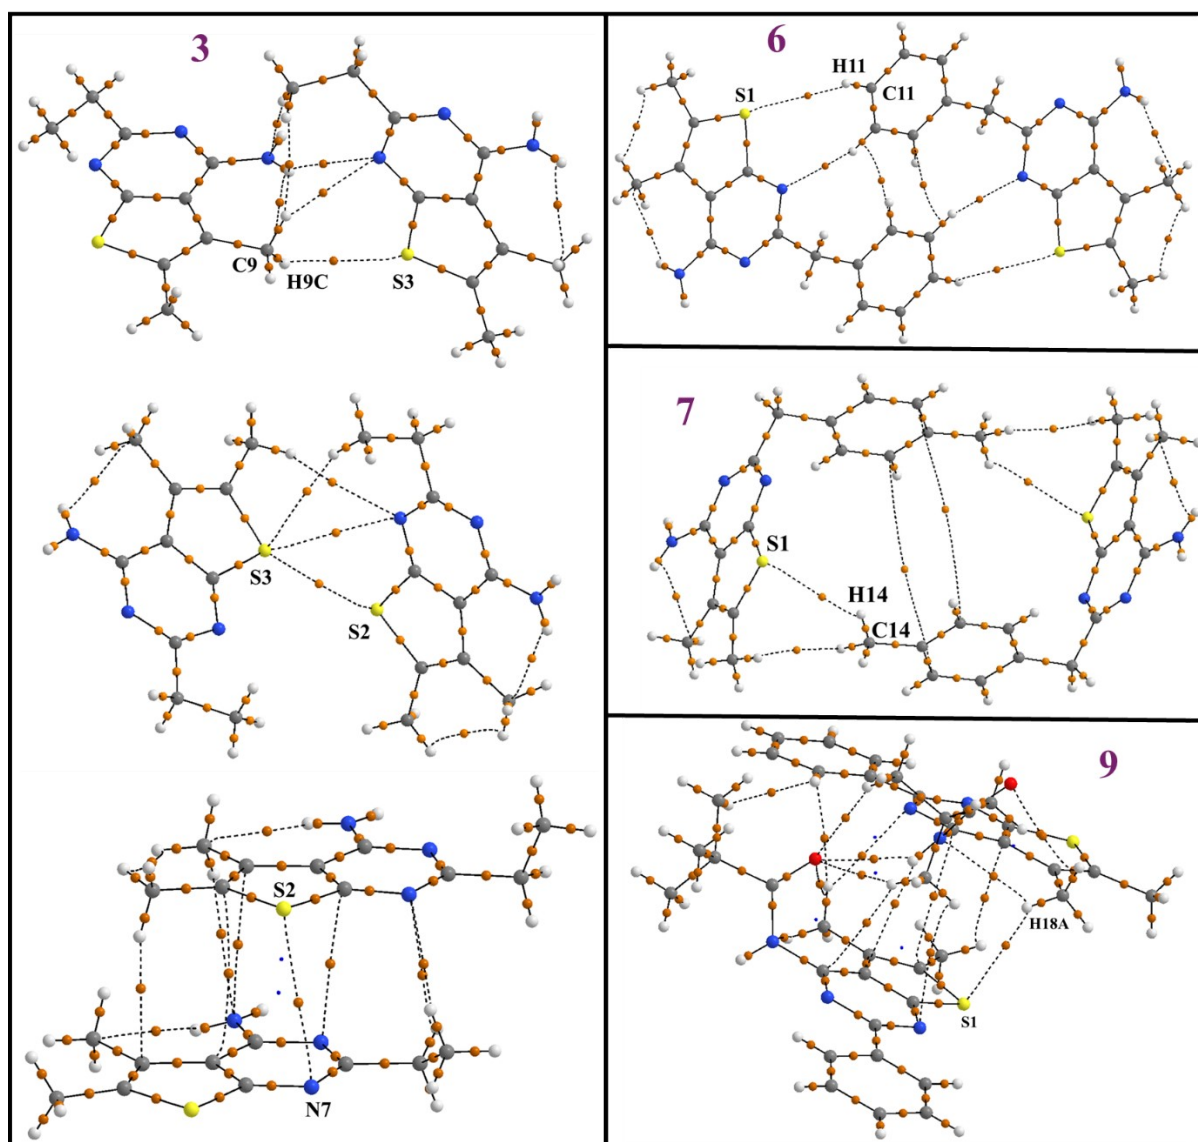

**Figure S12.** QTAIM analysis exhibits the bond critical points in dimeric motifs to be present along the bond path connecting the hydrogen and sulphur atom. Thus, C-H $\cdots$ S nature of interaction is found in compounds **3**, **6**, **7** and **9**.

## Reference

1. G.A.Jeffrey & L.Lewis, *Carbohydr.Res.*1978, **60**,179.
2. R.Taylor, O.Kennard, *Acta Cryst.*1983, **B39**,133.
